# Supplementary material for: Distinct roles of the meningeal layers in CNS autoimmunity
Source: Springer Nature journal article supplement (doi:10.1038/s41593-022-01108-3), 2022-06-30
Supplement: MOESM15 [file 41593_2022_1108_MOESM15_ESM.xlsx]

## Sheet: Tabelle1
Figure 1a
T cells (No. cells/g)											T cells (absolute numbers)
	SC Parenchyma			SC Leptomeninges			SC Dura					SC Parenchyma			SC Leptomeninges			SC Dura
CD4+	7482513	9998879	12247758	21899877	22146479	30677238	538030	291362	483476		CD4+	3091026	4179531	4547593	961405	1076319	1162667	12536.1	6934.4	9669.52
CD8+	1325862	1660308	1549049	37034340	36515524	38298578	522458	128208	319492		CD8+	547714	694009	575162	1625808	1774654	1451516	12173.3	3051.36	6389.85
CD45hi CD11b+ (No. cells/g)											CD45high CD11b+ (absolute numbers)
	SC Parenchyma			SC Leptomeninges			SC Dura					SC Parenchyma			SC Leptomeninges			SC Dura
MHCIIhigh	4835663	4597152	6332721	25422995	55151194	49493582	778937	972682	1070063		MHCIIhigh	1997612	1921610	2351339	475410	1367750	1187846	18149.2	23149.8	21401.3
MHCIIlow	206826	238884	340290	9600314	26266465	21602904	211829	176804	179105		MHCIIlow	85440	99853.4	126350	179526	651408	518470	4935.62	4207.93	3582.1
Figure 1b
T cells (No. cells/g)											T cells (absolute numbers)
	Br Parenchyma			Br Leptomeninges			Br Dura					Br Parenchyma			Br Leptomeninges			Br Dura
CD4+	1075159	1181457	1075549	5148948	8724676	9531990	40163.8	392001	249809		CD4+	195249	248697	258454	186907	313216	264989	566.309	7644.02	4746.37
CD8+	576902	551752	419496	5927232	8480467	7355126	5106.93	317213	96618.7		CD8+	104765	116144	100805	215158	304449	204472	72.0077	6185.65	1835.76
CD45hi CD11b+ (No. cells/g)											CD45hi CD11b+ (absolute numbers)
	Br Parenchyma			Br Leptomeninges			Br Dura					Br Parenchyma			Br Leptomeninges			Br Dura
MHCIIhigh	13897835	6674520	7011795	26288219	32170600	56170884	58564.3	690743	363291		MHCIIhigh	2.52385e+06	1.40499e+06	1.43251e+06	1.02288e+06	1.25342e+06	1.77116e+06	924.321	21622	12212.3
MHCIIlow	470363	640727	438855	4844572	7295677	16327458	14214.5	367662	332033		MHCIIlow	85417.9	134873	89658	526701	704948	1048069	2478.61	92705.6	140576
Figure 1c
TbSYN cells
No.cells/g														Absolute numbers
Day post-transfer	Bain Parenchyma				Br Leptomeninges				Br Dura					Day post-transfer	Bain Parenchyma				Br Leptomeninges				Br Dura
2	254.686	961.726	437.044	544.833	38519.4	304304	889587	92635.1	0	28295.6	2122.53	19144.1		2	299.41	1047.32	520.519	744.678	758.833	7607.59	16190.5	2000.92	0	565.912	38.6301	340.764
3	998199	1.05408e+06	860761	928035	1.64358e+08	1.28426e+08	2.02474e+08	1.29403e+08	2.07115e+06	3.82542e+06	1.1156e+06	1.63223e+06		3	1169190	1239174	1005197	1041255	6.90305e+06	5.39391e+06	4.45442e+06	2.58807e+06	49707.6	76508.5	18853.6	32644.6
4	1529004	3272421	2532879	3985786	33404428	50940655	30429222	57548689	201897	379495	149258	743410		4	2030212	3922978	3208652	4942374	1503199	1146165	389494	2301948	4643.63	7589.9	3731.46	18956.9
5	168573	292658	214722		804957	1135574	1724386		3672.31	76982.2	24828.8			5	213616	384494	273642		29219.9	40767.1	47937.9		51.7796	1501.15	471.747
6	6082.14	22953.4	18344.2		30648.1	78376.6	34476.9		4599.19	3540.05	5895.63			6	7212.2	28498.9	22225.9		677.322	1692.93	1034.31		80.4858	80.0051	119.681
TMBP cells
No.cells/g														Absolute numbers
Day post-transfer	Bain Parenchyma				Br Leptomeninges				Br Dura					Day post-transfer	Bain Parenchyma				Br Leptomeninges				Br Dura
3	110.622	78.3925	64.715		12795.6	34497.7	26138.1		3787.14	5036.82	3713.18			3	1117.72	360.836	805.053		228.743	256.878	227.989		83.0487	142.049	99.1743	340.764
4	2573.99	3929.83	4891.04		907724	331269	388034		65465	23268.3	81448.3			4	27685.6	10103.7	11796.2		2867.37	1342.58	5253.42		3150.82	4906.39	6445.41	32644.6
5	57673.4	45835.8	69478.4		1014914	1776982	1548485		186484	169638	202855			5	21922.2	56330.3	55435.8		9268.24	6649.83	12191.6		74156.5	58472.7	89509	18956.9
6	89480.3	68428.9			342982	645056			202698	130718				6	8848.92	19803.2			10601.1	6470.53			116280	81574.2
7	42395.9	45224.5			367695	203551			102330	119722				7	7353.89	6452.58			4164.82	3771.24			54139.6	54178.9
TOVA cells
No.cells/g														Absolute numbers
Day post-transfer	Bain Parenchyma				Br Leptomeninges				Br Dura					Day post-transfer	Bain Parenchyma				Br Leptomeninges				Br Dura
2	39.6973	79.6932			35405.7	19051			34708	21692.9				2	50.9713	102.087			1030.31	682.024			1291.14	826.5
3	3656.66	3541.17	1799.45		622732	937615	280328		181078	191641	228502			3	4888.6	4737.02	2383.56		18246.1	17908.5	6783.93		7895.01	2414.68	9505.69
4	2296.08	2458.78	2083.47		911205	1.24791e+06	1.70046e+06		611981	343688	85939.2			4	3182.37	3341.48	2799.14		31709.9	33693.7	31118.4		21847.7	18662.2	2930.53
5	1181.87	1031.87	673.193		688388	672198	598642		143068	143986	250875			5	1588.07	1330.8	901.675		11977.9	17275.5	17360.6		5708.39	7400.9	8203.6
6	78.4921	144.377			25975.2	10883.4			7964.94	6507.85				6	102.055	186.579			872.767	324.324			320.191	186.775
