# Supplementary material for: Distinct roles of the meningeal layers in CNS autoimmunity
Source: Springer Nature journal article supplement (doi:10.1038/s41593-022-01108-3), 2022-06-30
Supplement: MOESM16 [file 41593_2022_1108_MOESM16_ESM.xlsx]

## Sheet: Tabelle1
Figure 2 c
TbSYN cells	Br Leptomeninges				Br Dura
	Crawling (%)	Rolling (%)	Fast Rolling (%)		Crawling (%)	Rolling (%)	Fast Rolling (%)
	44	40	16		0	42.86	57.14
	32.35	55.88	11.76		0	32.26	67.74
	26.67	73.33	0		22.22	22.22	55.56
	66.67	33.33	0		0	16.67	83.33
	14.29	57.14	28.57		12.5	45.83	41.67
	62.5	37.5	0		12.5	50	37.5
	32.26	66.13	1.61		9.62	54.81	35.58
	43.24	48.65	8.11		2.94	64.71	32.35
TMBP cells	Br Leptomeninges				Br Dura
	Crawling (%)	Rolling (%)	Fast Rolling (%)		Crawling (%)	Rolling (%)	Fast Rolling (%)
	57.14	21.43	21.43		0	16.67	83.33
	61.9	28.57	9.52		0	0	100
	45.45	45.46	9.09		0	0	100
	75	0	25		0	0	100
	100	0	0		0	16.67	83.33
	50	50	0		0	0	100
	50	50	0		0	0	100
	36.36	9.09	54.55		16.67	16.67	66.67
	16.67	44.44	38.89		0	0	100
	55.56	25	19.44		0	0	100
	50	20	0		0	0	100
	50	16.67	0		0	11.11	88.89
	50	50	0		0	6.25	93.75
	75	25	0		0	4.55	95.45
	50	50	0		0	5	95
	42.86	57.14	0		0	0	100
	54.55	45.45	0		0	100	0
	50	50	0		5.88	64.71	29.41
					0	50	50
					11.11	55.56	33.33
					42.86	28.57	28.57
TOVA cells	Br Leptomeninges				Br Dura
	Crawling (%)	Rolling (%)	Fast Rolling (%)		Crawling (%)	Rolling (%)	Fast Rolling (%)
	40	10	50		0	0	100
	13.64	63.64	22.73		6.25	43.75	50
	20	46.67	33.33		0	100	0
	34.38	50	15.63		7.5	52.5	40
	33.33	16.67	50		11.43	42.86	45.71
	20	70	10		0	50	50
	22.22	61.11	16.67		0	100	0
	17.78	55.56	26.67		0	28.57	71.43
	50	25	25		0	50	50
	66.67	0	33.33		6.67	40	53.33
	14.71	58.82	26.47		10	50	40
	19.05	42.86	38.1		0	50	50
	18.42	44.74	36.84		0	0	100
	14.29	71.43	14.29		100	0	0
	0	100	0		0	0	100
	11.11	55.56	33.33		0	100	0
	44.44	29.63	25.93		0	50	50
	39.13	26.09	34.78		23.08	46.15	30.77
	15	45	40		0	50	50
	25	75	0		25	50	25
	23.08	38.46	38.46		0	42.86	57.14
	22.22	33.33	44.44		0	16.67	83.33
	0	60	40		3.77	60.38	35.85
	30	40	30		15.38	38.46	46.15
	28.57	71.43	0		0	0	100
					0	75	25
					20	50	30
					9.09	45.45	45.45
					7.69	46.15	46.15
					0	22.22	77.78
					10	20	70
					7.69	38.46	53.85
					0	12.5	87.5
