# Supplementary material for: Distinct roles of the meningeal layers in CNS autoimmunity
Source: Springer Nature journal article supplement (doi:10.1038/s41593-022-01108-3), 2022-06-30
Supplement: MOESM17 [file 41593_2022_1108_MOESM17_ESM.xlsx]

## Sheet: Tabelle1
Figure 3a
Ifng
Br Par	0.193	0.118	0.173	0.22	0.191	0.34	0.347	0.357	0.359	0.41	0.458
Br Lepto	0.0652	0.0371	0.0573	0.0165	0.0432	0.0721	0.0872	0.0418	0.0675	0.161	0.124
Br Dura	0.0197	0.00792	0.00605	0.0029	0.00399	0.0176	0.0398	0.0242	0.00656	0.0109	0.0154
CSF	0.0265		0.0115		0.0025		0.00242		0.000904		0.00316	pooled sample
Blood	0.000538		0.000182		0.000813		0.000563		0.000338	0.000283	0.000326	pooled sample
Il17a
Br Par	0.0572	0.0262	0.0278	0.0323	0.0278	0.0387	0.0425	0.0381	0.04	0.0387	0.0491
Br Lepto	0.0142	0.0113	0.00668	0.00414	0.00956	0.0106	0.0101	0.00477	0.00768	0.0109	0.0106
Br Dura	0.00467	0.00273	0.00387	0.000446	0.00138	0.000699	5.91e-05	0.00108	0.000785	0.000699	0.00127
CSF	0.00321		0.000536		1.6e-05		0.000222		2.71e-05		0.000431	pooled sample
Blood	Not detected		5.47e-06		Not detected		1.22e-06		7.92e-06	3.38e-06	4.28e-06	pooled sample
Figure 3b
	Br Parenchyma									Br Leptomeninges									Br Dura									Blood
IFNγ+	25.36	24.2	28.36	21.98	9.8	18.15	17.43	11.74		6.86	5.12	9.1	8.06	5.11	3.76	7.54			2.13	2.3	2.34	1.67	0.39	1.11	0.43	0.57		0	0.15	0	0	0	0	0
IL-17+	2.12	3.48	3.84	3.12	1.18	3.86	4.82	3.63		0.46	0.16	0.3	0.54	1.16	1.88	1.79			0.14	0.23	0.24	0.11	0.48	0	0.43	0.28		0	0	0.05	0	0	1.64	0
IL-17+ IFNγ+	16.4	23.54	25.54	16.14	0.78	11.19	13.97	6.93		1.43	0.86	1.52	1.64	2.69	1.64	3.2			0.41	0.14	0.3	0.25	0	0	0	0		0	0	0	0	0	0	0
Figure 3d
MOG-tEAE
% of Nur77+ TMOG cells
Br Leptomeninges	Br Dura
41.5	6.08
36.2	15.5
17.2	0
5.56	0
34.6	0
4.4	0
22.8	0
17.67	23.33	20.26	15.13	19.68	15.39	26.24	24.41	23.28	12.09	16.79	17.8	27.28	13.92	20.99	1.23	7.79	15.54	16.47	28.9	16.71	16.75	19.27	16.81	17.95
13.58	14.7	14.23	21.97	18.34	9.2	21.38	19.32	23.47	23.31	23.78	28.36	16.14	12.47	11.65	13.29	25.44	18.23	16.93	21.21	9.61	21.48	16.86	21.31	24.71	28.02	16.31	14.34	17.5	14.4	18.53	17.67	19.46	25.69	32.94	13.05	9.14	15.32	11.39	10.73	12.68	21.04	16.54	16.06	21.2	17.39	18.59	11.17	10.12	16.54
10.92	10.81	12.85	11.63	16.42	23.79	0	17.66	24.7	15.32	23.9	13.44	16.47	12.2	31.38	20.55	5.97	5.73	11.31	17.28	17.54	14.29	18.72	12.65	21.89	14.48	17.11	17.88	22.27	14.22	22.94	22.03	18.28	18.29	14.57	40.71	22.89	8.88	13.25	28.34	11.34	27.52	15.31	18.93	35.89	12.32	18.73	15.13	9.79	21.84
11.74	7.31	0	9.86	14.94	9.03	14.45	22.21	5.49	12.99	13.39	15.4	33.66	15.65	15.43	15.62	26.15	19.75	18.44	5.65	14.31	12.85	10.27	16.42	24.12	11.41	14.55	14.08	8.29	6.44	25.76	2.82	11.31	7.21	16.9	21.38	19.77	9.49	18.79	21.65	16.57	15.04	14.25	10.14	17.34	22.48	22.08	16.95	12.65	3.75
14.27	15.11	23.22	19.72	0	5.96	8.07	9.14	7.69	12	18.94	0.12	2.87	14.26	9.77	2.45	2.22	12.85	1.96	2.2	14.56	4.55	3.26	16.04	20.44	4.83	10.38	18.79	13.88	19.6	23.88	16.75	15.22	16.62	12.68	11.09	15.33	22.98	24.49	24.27	5.89	16.92	15.31	19.56	5.64	19.82	8.82	17.62	9.38	17.25
9.69	11.49	3.19	11	3.58	14.39	20.5	12.88	3.23	1.64	13.5	11.67	3.31	4.36	4.55	15.06	5.93	13.41	5.76	10.17	16.79	12.9	3.88	2.61	7.18	2.82	1.97	4.78	2.33	25.22	4.58	12.52	17.8	23.55	3.99	12.37	21.34	18.69	15.26	8.39	12.81	15.5	6.6	8.4	3.51	25.05	3.86	23.07	18.09	11.5
[truncated: 39 more columns]
