# Supplementary material for: Distinct roles of the meningeal layers in CNS autoimmunity
Source: Springer Nature journal article supplement (doi:10.1038/s41593-022-01108-3), 2022-06-30
Supplement: MOESM18 [file 41593_2022_1108_MOESM18_ESM.xlsx]

## Sheet: Tabelle1
Figure 4a
Ox40	Br Parenchyma	Br Parenchyma	Br Parenchyma	Br Parenchyma	Br Parenchyma	Br Parenchyma	Br Parenchyma	Br Parenchyma	Br Parenchyma	Br Parenchyma	Br Parenchyma	Br Parenchyma	Br Parenchyma	Br Parenchyma	Br Parenchyma	Br Parenchyma	Br Parenchyma	Br Parenchyma	Br Leptomeninges	Br Leptomeninges	Br Leptomeninges	Br Leptomeninges	Br Leptomeninges	Br Leptomeninges	Br Leptomeninges	Br Leptomeninges	Br Leptomeninges	Br Leptomeninges	Br Leptomeninges	Br Leptomeninges	Br Dura	Br Dura	Br Dura	Br Dura	Cervical LNs	Cervical LNs	Cervical LNs	Cervical LNs	Cervical LNs	Cervical LNs	Cervical LNs	Cervical LNs	Cervical LNs	Cervical LNs	Cervical LNs	Cervical LNs	Thymocytes	Thymocytes	Thymocytes
SYN	366.5	419	1096.5	615.6	700.667	598	421.333	462.667	310										598	472	422	262.667	271.333	257.5	445.667	460.667	478.667				357	530.333	519.333		494.667	509.667	503.25	385.667	359.333	383.333							327.667	355.333	342.333
Ct	263.5	274.5	265.5	299.667	295.667	351	425.667	279.333	182	271	276.5	295	362.667	342.667	371.667	458.333	352	436.667	184	146	167	241.667	213.333	256	263.667	263	231.333	272.333	249.333	258.6	83.4333	61.4	42.4333	125.333	44.5	49.6667	46.1	44.3667	45.8	45.8333	65.9	71.8667	71.8333	68.2667	68	70.1333	71.9	77.4333	78.8333
IL2R	Br Parenchyma	Br Parenchyma	Br Parenchyma	Br Parenchyma	Br Parenchyma	Br Parenchyma	Br Parenchyma	Br Parenchyma	Br Parenchyma	Br Parenchyma	Br Parenchyma	Br Parenchyma	Br Parenchyma	Br Parenchyma	Br Parenchyma	Br Parenchyma	Br Parenchyma	Br Parenchyma	Br Leptomeninges	Br Leptomeninges	Br Leptomeninges	Br Leptomeninges	Br Leptomeninges	Br Leptomeninges	Br Leptomeninges	Br Leptomeninges	Br Leptomeninges	Br Leptomeninges	Br Leptomeninges	Br Leptomeninges	Br Leptomeninges	Br Leptomeninges	Br Leptomeninges	Br Dura	Br Dura	Br Dura	Br Dura	Cervical LNs	Cervical LNs	Cervical LNs	Cervical LNs	Cervical LNs	Cervical LNs	Cervical LNs	Cervical LNs	Cervical LNs	Cervical LNs	Cervical LNs	Cervical LNs
SYN	2031	2282	2125	1184.67	1537.67	1693	1003	1188.67	1213.67										2091	1677.5	1994	349	366.667	344	1165.33	1171.67	1243							1743	679.667	1056		322.333	343	357.667	292.333	266.667	260
Ct	364.5	399.5	400	141	193.333	258.333	349.333	301.667	352.667	476	431.5	523.5	181.667	265.667	314	418.333	390.333	413.667	173	181	156	189	174	195	190.667	193.667	159	157	183	225	160	143.5	167.667	34.7667	31.35	19.7	47.4333	25.7	27.175	28.9667	19.9	26.8	25.3667	35.75	34.0333	35.9	35.1333	39.2333	32.4
Figure 4b
Ox40	Br Parenchyma	Br Parenchyma	Br Parenchyma	Br Parenchyma	Br Parenchyma	Br Parenchyma	Br Parenchyma	Br Parenchyma	Br Parenchyma	Br Parenchyma	Br Leptomeninges	Br Leptomeninges	Br Leptomeninges	Br Leptomeninges	Br Leptomeninges	Br Leptomeninges	Br Dura	Br Dura	Br Dura	Br Dura	Br Dura	Br Dura	dcLN	dcLN	dcLN	dcLN	dcLN	dcLN	dcLN	dcLN	Thymoc	Thymoc	Thymoc	Thymoc	Thymoc	Thymoc	Thymoc	Thymoc
MBP	710	508	489	649	513						1111	1124	1216				431	400	392				384	325	413	344					386	440	489	454
Ct	306	256	263	220	209	254	269	293	206	239	468	491	443	484	574	549	152	159	175	158	143	152	127	113	129	95.8	96.7	103	131	95.8	114	163	164	186	132	139	132	172
IL2R	Br Parenchyma	Br Parenchyma	Br Parenchyma	Br Parenchyma	Br Parenchyma	Br Parenchyma	Br Parenchyma	Br Parenchyma	Br Parenchyma	Br Parenchyma	Br Parenchyma	Br Parenchyma	Br Leptomeninges	Br Leptomeninges	Br Leptomeninges	Br Leptomeninges	Br Leptomeninges	Br Leptomeninges	Br Dura	Br Dura	Br Dura	Br Dura	Br Dura	Br Dura	dcLN	dcLN	dcLN	dcLN	dcLN	dcLN	dcLN	dcLN	Thymoc	Thymoc	Thymoc	Thymoc	Thymoc	Thymoc	Thymoc	Thymoc
MBP	442	470	672	693	378	454							1263	1492	1536				211	175	199				190	163	273	152					310	372	343	369
OVA	149	132	142	127	82.8	143	99.1	91.4	132	91.2	84.5	96	497	613	434	444	485	559	50.6	47.8	47.1	50.9	48.3	47	53.3	50.1	58.3	44	53.8	48.2	61.7	48.4	78.6	76.2	80.2	64.4	89.4	79.3	68.2	74.8
Figure 4c	TOVA cell mean velocity over time after transcranial OVA peptide application
00:00	17.67	23.33	20.26	15.13	19.68	15.39	26.24	24.41	23.28	12.09	16.79	17.8	27.28	13.92	20.99	1.23	7.79	15.54	16.47	28.9	16.71	16.75	19.27	16.81	17.95
30:00	13.58	14.7	14.23	21.97	18.34	9.2	21.38	19.32	23.47	23.31	23.78	28.36	16.14	12.47	11.65	13.29	25.44	18.23	16.93	21.21	9.61	21.48	16.86	21.31	24.71	28.02	16.31	14.34	17.5	14.4	18.53	17.67	19.46	25.69	32.94	13.05	9.14	15.32	11.39	10.73	12.68	21.04	16.54	16.06	21.2	17.39	18.59	11.17	10.12
60:00	10.92	10.81	12.85	11.63	16.42	23.79	0	17.66	24.7	15.32	23.9	13.44	16.47	12.2	31.38	20.55	5.97	5.73	11.31	17.28	17.54	14.29	18.72	12.65	21.89	14.48	17.11	17.88	22.27	14.22	22.94	22.03	18.28	18.29	14.57	40.71	22.89	8.88	13.25	28.34	11.34	27.52	15.31	18.93	35.89	12.32	18.73	15.13	9.79
90:00	11.74	7.31	0	9.86	14.94	9.03	14.45	22.21	5.49	12.99	13.39	15.4	33.66	15.65	15.43	15.62	26.15	19.75	18.44	5.65	14.31	12.85	10.27	16.42	24.12	11.41	14.55	14.08	8.29	6.44	25.76	2.82	11.31	7.21	16.9	21.38	19.77	9.49	18.79	21.65	16.57	15.04	14.25	10.14	17.34	22.48	22.08	16.95	12.65
120:00	14.27	15.11	23.22	19.72	0	5.96	8.07	9.14	7.69	12	18.94	0.12	2.87	14.26	9.77	2.45	2.22	12.85	1.96	2.2	14.56	4.55	3.26	16.04	20.44	4.83	10.38	18.79	13.88	19.6	23.88	16.75	15.22	16.62	12.68	11.09	15.33	22.98	24.49	24.27	5.89	16.92	15.31	19.56	5.64	19.82	8.82	17.62	9.38
150:00	9.69	11.49	3.19	11	3.58	14.39	20.5	12.88	3.23	1.64	13.5	11.67	3.31	4.36	4.55	15.06	5.93	13.41	5.76	10.17	16.79	12.9	3.88	2.61	7.18	2.82	1.97	4.78	2.33	25.22	4.58	12.52	17.8	23.55	3.99	12.37	21.34	18.69	15.26	8.39	12.81	15.5	6.6	8.4	3.51	25.05	3.86	23.07	18.09
	No. TOVA cells per time interval (No. TOVA cells counted/frame/30 minutes)
00:00	2.10345	2.74138	5.7931	2.93103	3.37931
150:00	39.3103	6.94828	6.84483	7.7931	13.931
Figure 4d
Ox40	Br Parenchyma	Br Parenchyma	Br Parenchyma	Br Parenchyma	Br Parenchyma	Br Parenchyma	Br Leptomeninges	Br Leptomeninges	Br Leptomeninges	Br Leptomeninges	Br Leptomeninges	Br Leptomeninges	Br Dura	Br Dura	Br Dura	Br Dura			DCLN	DCLN	DCLN	DCLN	DCLN	DCLN	IngLN	IngLN	IngLN	IngLN	IngLN	IngLN	Thymocytes	Thymocytes	Thymocytes	Thymocytes	Thymocytes	Thymocytes
SYN	180.333	207.667	215.333				237	258.667	228.333				480.667	511	433.75				496	477.667	482				374.667	348.667	430.333				346.667	367.25	355
Ct	266	260	215.667	210.667	224	220	100.533	107.667	116	112.5	155.333	120.333	36.1667	39.5333	29.1333	34.3667			50.6667	48.2333	45.9667	50.1667	50.7	48.3	64.1	61.4333	61.8	63	55.3	68.5667	28.1333	33.6667	31.3333	32.55	31.2	27.5667
IL2R	Br Parenchyma	Br Parenchyma	Br Parenchyma	Br Parenchyma	Br Parenchyma	Br Parenchyma	Br Leptomeninges	Br Leptomeninges	Br Leptomeninges	Br Leptomeninges	Br Leptomeninges	Br Leptomeninges	Br Dura	Br Dura	Br Dura	Br Dura			DCLN	DCLN	DCLN	DCLN	DCLN	DCLN	IngLN	IngLN	IngLN	IngLN	IngLN	IngLN	Thymocytes	Thymocytes	Thymocytes	Thymocytes	Thymocytes	Thymocytes
SYN	317.667	356	273.333				913.333	1018	1073.33				861.333	948.667	906				201.667	205.333	220.25				202.667	249.667	247.333				423.5	477.333	482
Ct	150.5	345.333	360	178	195.333	180.333	267	273.5	383.333	315	345	285.667	16.8667	17.8333	16.1	16.9			21.9	19	20.1	17.6	19.4667	19.8	39	35.5	34.6	36.8	31.7333	41.4333	19.7333	21.0667	18.1333	18.5667	17.8667	18.0667
[truncated: 40 more columns]
