# Supplementary material for: Distinct roles of the meningeal layers in CNS autoimmunity
Source: Springer Nature journal article supplement (doi:10.1038/s41593-022-01108-3), 2022-06-30
Supplement: MOESM19 [file 41593_2022_1108_MOESM19_ESM.xlsx]

## Sheet: Sheet1
Figure 5a
Br Par	Br Lepto	Br Dura	CSF	Blood	dcLN	ingLN	Spleen
7502.24	2979108	39950.6	97625.3	40.1606	1862.1	1614.59	0
17578.4	3836247	165899	485417	14.862	2591.7	959.693	1489.45
5600.68	2079703	11933.7	6824.1	0	163.844	0	18.4616
2126.73	400148	21574.8	12086	3.11564	0	341.692	11.1603
Figure 5c
No. TbSYN cells/g
day p.t.	dcLN	dcLN	dcLN	dcLN	ingLN	ingLN	ingLN	ingLN	Br Leptomeninges	Br Leptomeninges	Br Leptomeninges	Br Leptomeninges	Br Dura	Br Dura	Br Dura	Br Dura
2	109946	196.719	720308	188816	372834	346598	421679	495756	38519.4	304304	889587	92635.1	0	28295.6	2122.53	19144.1
3	9.97273e+06	7.97791e+06	1.76739e+07	1.98476e+06	632443	1.37445e+06	1.49401e+06	1.43239e+06	1.64358e+08	1.28426e+08	2.02474e+08	1.29403e+08	2.07115e+06	3.82542e+06	1.1156e+06	1.63223e+06
4	1867929	650364	2288614	3589050	189304	120466	146417	137815	33404428	50940655	30429222	57548689	201897	379495	149258	743410
5	21013.9	21029.6	3898.64		6156.36	22316	2431.9		804957	1135574	1724386		3672.31	76982.2	24828.8
6	2889.78	8899.35	5952.53		6209.01	3713.28	8677.81		30648.1	78376.6	34476.9		4599.19	3540.05	5895.63
Absolute No. TbSYN cells
day p.t.	dcLN	dcLN	dcLN	dcLN	ingLN	ingLN	ingLN	ingLN	Br Leptomeninges	Br Leptomeninges	Br Leptomeninges	Br Leptomeninges	Br Dura	Br Dura	Br Dura	Br Dura
2	1869.08	12.9834	19880.5	3304.28	17709.6	14938.4	15475.6	21466.2	758.833	7607.59	16190.5	2000.92	0	565.912	38.6301	340.764
3	225384	132433	415336	44260.2	17265.7	45631.9	57220.7	44977.1	6.90305e+06	5.39391e+06	4.45442e+06	2.58807e+06	49707.6	76508.5	18853.6	32644.6
4	66685.1	22307.5	28150	42350.8	6417.42	3674.23	4714.63	4823.53	1503199	1146165	389494	2301948	4643.63	7589.9	3731.46	18956.9
5	336.222	168.237	44.4444		213.01	446.321	55.4472		29219.9	40767.1	47937.9		51.7796	1501.15	471.747
6	67.0428	188.666	80.3591		254.569	147.046	294.178		677.322	1692.93	1034.31		80.4858	80.0051	119.681
No. TMBP cells/g
day p.t.	dcLN	dcLN	dcLN	ingLN	ingLN	ingLN	Br Leptomeninges	Br Leptomeninges	Br Leptomeninges	Br Dura	Br Dura	Br Dura
3	24799.8	34285.3	40507.7	23428	44008.9	67851.9	12795.6	34497.7	26138.1	3787.14	5036.82	3713.18
4	186162	382008	327529	117019		62273.5	907724	331269	388034	65465	23268.3	81448.3
5	216374	146652	146964	504957	215675	119414	1014914	1776982	1548485	186484	169638	202855
6	522705	141178		253976	129309		342982	645056		202698	130718
7	133751	98591.9		117346	74522		367695	203551		102330	119722
Absolute No. TMBP cells
day p.t.	dcLN	dcLN	dcLN	ingLN	ingLN	ingLN	Br Lepto	Br Lepto	Br Lepto	Br Dura	Br Dura	Br Dura
3	255.437	308.567	461.788	1309.54	1329.07	637.243	1117.72	360.836	805.053	228.743	256.878	227.989
4	4650.91	2252.57	7831.17	1737.43	3182.92	2161.65	27685.6	10103.7	11796.2	2867.37	1342.58	5253.42
5	3556.53	5971.92	2405.1	11517	6305.06	28681.6	21922.2	56330.3	55435.8	9268.24	6649.83	12191.6
6	9304.15	1609.43		5358.9	4370.64		8848.92	19803.2		10601.1	6470.53
7	1417.76	1192.96		2487.74	2086.61		7353.89	6452.58		4164.82	3771.24
No. TOVA cells/g
day p.t.	dcLN	dcLN	dcLN	ingLN	ingLN	ingLN	Br Leptomeninges	Br Leptomeninges	Br Leptomeninges	Br Dura	Br Dura	Br Dura
2	15818.2	21615.5		52164.2	68486.6		35405.7	19051		34708	21692.9
3	1.54912e+06	753972	1.41777e+06	990235	842558	990119	622732	937615	280328	181078	191641	228502
4	2.24734e+06	1.29901e+06	1.34423e+06	1.80282e+06	904220	1.07808e+06	911205	1.24791e+06	1.70046e+06	611981	343688	85939.2
5	142891	106784	21932.3	73639.9	149413	135041	688388	672198	598642	143068	143986	250875
6	7856.83	23196.2		64014.9	27667.6		25975.2	10883.4		7964.94	6507.85
Absolute No. TOVA cells
day p.t.	dcLN	dcLN	dcLN	ingLN	ingLN	ingLN	Br Leptomeninges	Br Leptomeninges	Br Leptomeninges	Br Dura	Br Dura	Br Dura
2	314.782	583.62		1314.54	2917.53		1030.31	682.024		1291.14	826.5
3	26180.1	11460.4	23676.8	37926	38589.1	36832.4	18246.1	17908.5	6783.93	7895.01	2414.68	9505.69
4	56857.7	35592.9	27422.3	86354.9	48556.6	50777.7	31709.9	33693.7	31118.4	21847.7	18662.2	2930.53
5	2543.46	2338.57	480.318	3321.16	7933.83	7616.33	11977.9	17275.5	17360.6	5708.39	7400.9	8203.6
6	281.274	668.049		3104.72	1773.5		872.767	324.324		320.191	186.775
Figure 5e
No. TbSYN cells/g										No. CD4+ T cells/g
AAV-rVEGFR3 brGM	AAV-Sham brGM	PBS brGM	AAV-rVEGFR3 brLepto	AAV-Sham brLepto	PBS brLepto	AAV-rVEGFR3 brDura	AAV-Sham brDura	PBS brDura		AAV-rVEGFR3 brGM	AAV-Sham brGM	PBS brGM	AAV-rVEGFR3 brLepto	AAV-Sham brLepto	PBS brLepto	AAV-rVEGFR3 brDura	AAV-Sham brDura	PBS brDura
265029	119891	116868	3068075	2340557	2618588	12566.9	1864.11	157902		23883.3	28148.6	26120.7	9685864	10652513	10600250	27761.1	71885.5	734491
103467	298466	123124	711719	1645108	1551174	5906.3	8852.14	5574.68		33789.5	13554	53706.2	8132244	6713245	14023395	26296.5	8831.88	11372.3
159972	186954	148653	431629	2310458	774500	40843.3	28745.3	23950		69324.4	45318.5	47720	5310223	13163036	11028749	153718	61232.9	120589
36514.3	54713.9	100465	3718166	5360438	3490359	85784.3	118928	138280		15666.1	12303.9	24589.8	1535772	2114547	2879339	127197	171692	211127
50835.6	24038.1	50930.3	2634694	3420976	3059350	82963.9	16464	134431		18036	13469.6	17872.9	3068075	2340557	2618588	184497	29128.7	259945
28409.2	4399.5	59925.1	1842321	2769224	3931452	53073.9	53083.9	43279		16820.4	4507.18	21220	711719	1645108	1551174	110202	126896	98014.3
54739.2	36507.5	43051.2	1535772	2114547	2879339	159457	19861.4	84218.6		24864	15328.6	16015	431629	2310458	774500	383559	40145.4	203042
Figure 5f
day p.t.	AAV-rVEGFR3	AAV-rVEGFR3	AAV-rVEGFR3	AAV-rVEGFR3	AAV-rVEGFR3	AAV-rVEGFR3	AAV-rVEGFR3	AAV-rVEGFR3	AAV-rVEGFR3	AAV-rVEGFR3	AAV-rVEGFR3	AAV-rVEGFR3	AAV-rVEGFR3	AAV-Sham	AAV-Sham	AAV-Sham	AAV-Sham	AAV-Sham	AAV-Sham	AAV-Sham	AAV-Sham	AAV-Sham	AAV-Sham	AAV-Sham	AAV-Sham	PBS	PBS	PBS	PBS	PBS	PBS	PBS	PBS	PBS	PBS	PBS
0	0	0	0	0	0	0	0	0	0	0	0	0	0	0	0	0	0	0	0	0	0	0	0	0	0	0	0	0	0	0	0	0	0	0	0	0
1	0	0	0	0	0	0	0	0	0	0	0	0	0	0	0	0	0	0	0	0	0	0	0	0	0	0	0	0	0	0	0	0	0	0	0	0
2	0	0	0	0	0	0	0	0	0	0	0	0	0	0	0	0	0	0	0	0	0	0	0	0	0	0	0	0	0	0	0	0	0	0	0	0
3	0	0	0	0	0	0	0	0	0	0	0	0	0	0	0	0	0	0	0	0	0	0	0	0	0	0	0	0	0	0	0	0	0	0	0	0
4	0.5	0	0	0	0.5	0.5	0.5	0	0	0	0	0	1	0	0.5	0	0	0.5	0.5	0.5	0	0	0	0	0	0	1	0	0	0.5	0.5	0.5	0	0	1	0
5	1	2	1	1				0	0	0.5	0.5	0.5	1.5	0	2	0.5	2				0	0	0	0.5	0.5	2	1.5	0.5	0.5				0.5	0	1.5	0
6	1.5	2	1.5	1				1.5	1.5	2	2	2.5	2	1	2	1	2				0.5	1.5	0.5	2	1	2	2	2	2				1.5	1.5	2	2
7	1	1.5	1.5	1					2.5			2		1	1	1	1.5						2			1.5	1	1.5	1.5
8	0.5	0.5	0.05	0.5					2			1.5		1	0.5	0.5	1.5						1.5			1.5	0.5	1	1
