# Supplementary material for: Distinct roles of the meningeal layers in CNS autoimmunity
Source: Springer Nature journal article supplement (doi:10.1038/s41593-022-01108-3), 2022-06-30
Supplement: MOESM20 [file 41593_2022_1108_MOESM20_ESM.xlsx]

## Sheet: Tabelle1
Fig. 6a
CD4+ T cells 1xEAE/g	Lepto 1xTbSYN cells	Dura 1xTbSYN cells		Lepto 1xTOVA cells	Dura 1xTOVA cells		Infiltrating monocytes/macrophages 1xEAE/g	Lepto 1xTbSYN cells	Dura 1xTbSYN cells		Lepto 1xTOVA cells	Dura 1xTOVA cells
	319291	3053.35		169579	15787.2			1150055	3054.4		441466	7791.62
	814897	3819.2		148016	20175.2			1401963	4049.63		361051	9100.87
	405351	8676.79		105937	18145.6			2087885	15885		399702	9335.42
	354316	143851		108541	20371			2.21532e+06	875022		930093	46631.1
	208113	10631.1		102676	5892.37			1.61723e+06	70670.9		2.2557e+07	80313.5
CD4+ T cells 4xEAE/g	Lepto 4xTbSYN cells	Dura 4xTbSYN cells		Lepto 4xTOVA cells	Dura 4xTOVA cells		Infiltrating monocytes/macrophages 4x EAE/g	Lepto 4xTbSYN cells	Dura 4xTbSYN cells		Lepto 4xTOVA cells	Dura 4xTOVA cells
	164696	75466.2		80510.3	7380.77			1.19798e+07	80655.9		548429	10208.8
	357912	1728.92		80296.8	11085			1949360	9919.7		858012	5514.49
	533091	38810.3		82605.8	61141.8			2388057	158329
	1261370	4654.84		48762.7	6040.31			3341508	17084.9		617240	11608.7
Figure 6d
Patient n.	Hemispheres	SSS frontalis	SSS parietalis	SSS occiptalis	Confluens sinuum	Sinus transversus	Leptomeninges
1	0.749198	1.31484	0.888919	3.3987	1.75922	1.82066	71.8632
2	0.400546	1.07848	3.60861	sample not available	sample not available	sample not available	572.483
3	1.40244	4.0252	5.79454	2.11685	6.51899	5.77697	105.166
4	0.420397	1.76739	1.27265	0.429294	3.88058	1.48757	123.357
5	0.748701	2.02232	2.21943	0.650689	sample not available	sample not available	96.9981
6	2.45601	4.55785	1.96309	1.89195	sample not available	sample not available	29.2351
7	3.86277	5.89102	6.44956	13.5354	sample not available	3.10586	173.122
8	0.155115	sample not available	sample not available	0.848521	sample not available	sample not available	26.3338
9	2.47165	0.314963	4.7496	5.5831	sample not available	sample not available	89.874
10	0.422076	0.371093	0.37556	0.43617	sample not available	sample not available	101.312
11	1.17158	0.344991	1.49279	0.705144	3.11941	0.731344	33.8891
12	0.40188	1.72606	1.76615	sample not available	sample not available	sample not available	54.4626
13	sample not available	1.45483	2.67797	1.63885	5.61936	4.30187	9.73734
Figure 6e
X axis	Y axis
CD8+ cell/mm2 (Dura)	CD8+ cell/mm2 (Leptomeninges)
1.65526	71.8632
1.69588	572.483
3.75899	105.166
1.30984	123.357
1.41028	96.9981
2.48045	29.2351
6.56893	173.122
0.501818	26.3338
3.90174	89.874
0.401225	101.312
1.49097	33.8891
1.11407	54.4626
3.13857	9.73734
