# Supplementary material for: Distinct roles of the meningeal layers in CNS autoimmunity
Source: Springer Nature journal article supplement (doi:10.1038/s41593-022-01108-3), 2022-06-30
Supplement: MOESM21 [file 41593_2022_1108_MOESM21_ESM.xlsx]

## Sheet: Tabelle1
Extendend Data Fig. 1a
MBP-tEAE clinic
Day p.t.	Score
1	0	0	0	0
2	0	0	0.5	0
3	1.5	2	2	1.5
4	3	3	2.5	3
5	2.5	3	2.5	2.5
6	2.5	2.5	2	2
7	1	1	1	1
8	0	0	0	0
bSYN-tEAE clinic
Day p.t.	Score
1	0	0	0	0
2	0	0	0	0
3	1	1	2	1.5
4	3	2.5	2.5	3
5	3	2.5	2	2
6	2.5	2	1.5	1
7	1.5	1	0.5	0
8	0	0	0	0
Extendend Data Fig. 1b
No. of cells/g
	Br Parenchyma	Br Parenchyma	Br Parenchyma	Br Parenchyma	Br Leptomeninges	Br Leptomeninges	Br Leptomeninges	Br Leptomeninges	Br Dura	Br Dura	Br Dura	Br Dura
CD4	969.099	1066.22	666.708	1371.98	628400	524533	913256	453889	98122.1	62597.8	435997	170434
CD8	410.276	288.767	276.82	519.275	289351	381189	679608	312828	30583.5	16767.3	143815	34633.6
Absolute No. of cells
	Br Parenchyma	Br Parenchyma	Br Parenchyma	Br Parenchyma	Br Leptomeninges	Br Leptomeninges	Br Leptomeninges	Br Leptomeninges	Br Dura	Br Dura	Br Dura	Br Dura
CD4	329.494	575.758	413.359	603.671	13824.8	12064.3	20639.6	9077.78	1471.83	1070.42	9155.94	3596.15
CD8	139.494	155.934	171.629	228.481	6365.73	8767.35	15359.1	6256.57	458.752	286.72	3020.12	730.769
Extendend Data Fig. 1d
No. TbSYN cells/g
day p.t.	SC Parenchyma	SC Parenchyma	SC Parenchyma	SC Parenchyma	SC Parenchyma	SC Parenchyma	SC Leptomeninges	SC Leptomeninges	SC Leptomeninges	SC Leptomeninges	SC Leptomeninges	SC Leptomeninges	SC Dura	SC Dura	SC Dura	SC Dura	SC Dura	SC Dura
2	1944.48	672.237	579.772	335.036			110762	49319.9	24262.1	15494			114674	33081.8	17366.6	14269.8
3	1923633	1996104	637175	182034	984659	401836	12798800	24808820	28809230	2.6512e+06	1.66087e+06	1.1089e+07	1125178	1492142	2478880	357018	505369	791724
4	7846351	6868372	2907919	6.50722e+06	5.72849e+06	3.19426e+06	3511552	6680706	3101810	14964312	9.27576e+06	9339948	2811501	1660432	1188366	5.7132e+06	3.61247e+06	1.16792e+06
5	3020693	1328288	1613075				2773512	3054407	2001724				1007651	517353	304716
Absolute No. TbSYN cells
day p.t.	SC Parenchyma	SC Parenchyma	SC Parenchyma	SC Parenchyma	SC Parenchyma	SC Parenchyma	SC Leptomeninges	SC Leptomeninges	SC Leptomeninges	SC Leptomeninges	SC Leptomeninges	SC Leptomeninges	SC Dura	SC Dura	SC Dura	SC Dura	SC Dura	SC Dura
2	628.651	206.78	190.165	114.247			5095.07	2322.97	834.617	477.215			3440.21	1012.3	350.805	285.395
3	33712.8	505916	504415	48093.4	29382.2	110746	473556	714494	829706	104722	59459.2	362611	29592.2	38646.5	7318.87	12381.6	16942.9
4	3590490	2701560	1281423	2.17081e+06	1.77698e+06	1.09947e+06	115179	316220	135239	769166	520370	467931	130828	75051.6	39612.2	122263	106207	23475.2
5	952122	491466	451661				105671	113013	54046.5				26400.5	13451.2	5484.88
No. TMBP cells/g
day p.t.	SC Parenchyma	SC Parenchyma	SC Parenchyma	SC Leptomeninges	SC Leptomeninges	SC Leptomeninges	SC Dura	SC Dura	SC Dura
3	263.007	536.185	384.075	1150.38	2738.79	939.184	584.309	448.97	409.169
4	33958.1	39258.7	78251.7	299170	952410	907245	16594.1	7140.86	8872.01
5	3528765	2118598	1871221	276303	215957	517391	6180.17	17646.5	12480.5
6	1175653	1291534		311146	365346		85617.8	2046.11
7	182998	221116		85839.7	82911.2		31633.9	66367.3
Absolute No. TMBP cells
day p.t.	SC Parenchyma	SC Parenchyma	SC Parenchyma	SC Leptomeninges	SC Leptomeninges	SC Leptomeninges	SC Dura	SC Dura	SC Dura	SC Dura
3	74.1679	122.25	102.932	46.9356	94.4883	29.1147	20.3339	10.3263	10.352
4	8801.93	10705.8	22740	13043.8	40763.2	44545.7	418.172	199.944	249.303
5	1220953	741721	590183	14948	11877.6	23800	151.414	388.224	336.973
6	426409	478126		16024	15783		804.807	51.1528
7	57241.9	63880.5		3141.73	3349.61		661.148	789.771
No. TOVA cells/g
day p.t.	SC Parenchyma	SC Parenchyma	SC Parenchyma	SC Parenchyma	SC Parenchyma	SC Parenchyma	SC Parenchyma	SC Leptomeninges	SC Leptomeninges	SC Leptomeninges	SC Leptomeninges	SC Leptomeninges	SC Leptomeninges	SC Leptomeninges	Sc Dura	Sc Dura	Sc Dura	Sc Dura	Sc Dura	Sc Dura	Sc Dura
2	279.001	590.335	832.99	491.296	0	0	0	2873.49	16972.6	4916.82	697.763	0	0	0	1054.44	5858.15	20481	12590.6	491.874	1368.7	353.199
3	5395.41	957.09	1127.11	1109.22	179.157	225.143	264.067	5503.53	6118.81	7623.96	6324.87	1725.76	496.026	7780.56	7627.4	5237.98	46988	7058.59	5210.64	2108.21	4649.64
4	3052.45	1600.47	1597.01	1513.68	3846.58	2450.35	1272.25	49497.9	6123.98	21674.7	19972.7	754.535	23723.9	13739.1	11047.4	46470.2	77277.4	30740	17625.2	26721.1	11560.8
5	7059.06	4227.46	4813.68	2566.38	4703.12	6448.79		13837.3	53937.4	74823.6	25033.2	21584.6	22232.6	29505	1996.56	27970.5	27306.7	24507.3	45653.1	11947.5	16469.4
6	3320.11	4102.23	6483.37	5424.4	10753.4	6100.03	5712.05	14148	86927.1	165949	58654.8	192268	54710.8	48319.4	5046.58	17937	22460.6	31893.4	16738.8	26392.4	21209.6
7	10266.5	9656.35	7346.78	4202.22				114917				81059.4	37750.7	15550.1	9858.69				19418.6	77367.1	11912.5
8	6619.2	1123.95	1546.02					9885.13				8519.67	12357.9		10726.6				6567.15	11912.4
Absolute No. TOVA cells
	SC Parenchyma	SC Parenchyma	SC Parenchyma	SC Parenchyma	SC Parenchyma	SC Parenchyma	SC Parenchyma	SC Leptomeninges	SC Leptomeninges	SC Leptomeninges	SC Leptomeninges	SC Leptomeninges	SC Leptomeninges	SC Leptomeninges	Sc Dura	Sc Dura	Sc Dura	Sc Dura	Sc Dura	Sc Dura	Sc Dura
2	144.495	236.134	316.536	185.808	0	0	0	227.006		1026.84	259.116	34.3997	0	0	61.7902	228.468	919.597	416.748	16.9205	50.6418	17.0242
3	2044.86	334.981	403.505	435.701	49.9669	66.8675	84.0262	261.968	313.283	413.219	313.081	66.2693	16.5673	299.551	405.777	183.329	2137.95	334.577	182.373	49.7537	149.718
4	1684.04	602.899	520.786	567.328	1284.76	755.197	527.855	1816.57	334.982	827.975	1002.63	37.6513	1266.85	589.408	819.714	2072.57	2952	1573.88	569.293	1068.84	373.413
5	3270.46	1484.69	1566.85	943.657	1522.87	1033.11	2097.15	601.924	2384.03	2626.31	1126.49	1031.74	1033.82	1227.41	82.0584	992.952	903.853	838.149	1387.86	363.204	556.665
6	1563.44	1227.8	2046.8	1850.26	3667.97	2038.02	1733.61	789.46	3442.31	6654.56	2375.52	7575.37	2363.51	2068.07	275.543	701.336	788.366	1218.33	594.228	659.811	629.924
7	5855.98	2171.71	2774.14	1295.96				3390.06	3955.7	1812.04	466.503				472.231	732.08	2769.74	431.233
8	3912.61	387.314	513.741					824.42	412.352	611.714					539.548	287.641	435.994
Extended Data Fig. 1e
TbSYN cells/field of view			TMBP cells/field of view			TOVA cells/field of view
Br Leptomeninges	Br Dura		Br Leptomeninges	Br Dura		Br Leptomeninges	Br Dura
58.25	1.93		9	7		26	5
132	2		57.6667	7.66667		27	6
221	2		64	10		16.6667	10.3333
228	7		17.3333	10.3333		17	4
			67.6667	4.25		10.3333	5.33333
Extended Data Fig. 1f
Clinical course
Days post-immunization
1	0	0	0	0	0	0	0	0
2	0	0	0	0	0	0	0	0
3	0	0	0	0	0	0	0	0
4	0	0	0	0	0	0	0	0
5	0	0	0	0	0	0	0	0
6	0	0	0	0	0	0	0	0
7	0	0	0	0	0	0	0	0
8	0	0	0	0	0	0	0	0
9	0	0	0	0	0	0.5	0	0.5
10	0	0	0	0	0.5	2.5	0	2.5
11	0	0.5	0	0.5	2	3	0	3.5
12	0.5	3	2	2.5	3	3.5	1
13	2	3.5	2.5	3	3.5		2.5
14	3		3				3
Cell counts
Preclinical phase
CD4+ T cells/mg				CD8+ T cells/mg				Infiltrating monocytes/macrophages/mg
SC parenchyma	SC meninges	SC dura		SC parenchyma	SC meninges	SC dura		SC parenchyma	SC meninges	SC dura
16	37	2		6	12	1		139	220	43
2	60	2		1	13	0		29	356	16
9	8	1		2	1	0		31	68	16
2	1	13		2	2	0		50	199	9
0	1	0		0	3	0		49	61	0
1	0	2		0	0	0		19	52	0
1	4	0		0	0	0		6	41	0
2	0	0		0	1	0		25	33	0
9	14	0		7	2	0		9	124	0
Onset
CD4+ T cells/mg				CD8+ T cells/mg				Infiltrating monocytes/macrophages/mg
SC parenchyma	SC meninges	SC dura		SC parenchyma	SC meninges	SC dura		SC parenchyma	SC meninges	SC dura
48	1049	1		9	37	1		1387	5133	42
34	472	2		8	35	0		645	1246	8
155	232	10		38	32	0		355	1343	18
419	No cells detected in sample	1		36	No cells detected in sample	2		122	No cells detected in sample	57
209	3486	28		29		2		756	3556	53
40	104	10		10	21	2		204	4025	42
47	144	7		9	7	1		275	781	60
Peak
CD4+ T cells/mg				CD8+ T cells/mg				Infiltrating monocytes/macrophages/mg
SC parenchyma	SC meninges	SC dura		SC parenchyma	SC meninges	SC dura		SC parenchyma	SC meninges	SC dura
522	5622	50		48	522	1		1454	12254	112
1130	1426	44		141	110	1		4785	2723	109
1626	4911	18		126	358	0		3423	6553	55
1867	6026	319		171	861	7		3704	6400	300
803	3309	5		89	325	0		1883	7973	33
411	3796	12		64	208	1		1085	615	492
87	235	35		18	13	2		333	3775	96
1188	4721	58		122	73	1		4047	2770	81
477	2980	100		49	35	2		1080	2302	69
755	1258	22		100	58	2		2279	5418	56
