# Supplementary material for: Distinct roles of the meningeal layers in CNS autoimmunity
Source: Springer Nature journal article supplement (doi:10.1038/s41593-022-01108-3), 2022-06-30
Supplement: MOESM22 [file 41593_2022_1108_MOESM22_ESM.xlsx]

## Sheet: Tabelle1
Extended Data Fig. 2a
No. TbSYN cells/g				Absolute No. TbSYN cells				No. recruited CD4+ T cells/g				Absolute No. recruited CD4+ T cells
Br Parenchyma	Br Leptomeninges	Br Dura		Br Parenchyma	Br Leptomeninges	Br Dura		Br Parenchyma	Br Leptomeninges	Br Dura		Br Parenchyma	Br Leptomeninges	Br Dura
9.77836	16014.2	1616.31		12.7119	320.285	50.5904		412.439	189502	9692.38		536.17	3790.04	303.372
0	8785.63	499.062		0	114.213	12.6263		498.696	23428.3	2994.37		648.305	304.568	75.7576
19.5071	8389.26	3641.35		25.3593	100.671	76.4683		233.493	41946.3	10337.7		303.541	503.356	217.092
29.7128	32193.8	1536.92		38.6266	354.132	25.3593		156.057	400123	15373.1		202.874	4401.35	253.657
0	17211.7	1718.21		0	154.905	51.5464		1208.32	69095.5	17678.7		1570.82	829.146	519.752
85.4701	43252.6	1594.39		102.564	519.031	25.5102		1688.56	527826	111252		2195.12	4750.43	3337.55
44.2087	11180.1	0		51.7241	156.522	0		2841.88	1284602	138174		3410.26	15415.2	2210.78
151.015	16457.7	461.226		193.299	181.035	6.45717		2254.64	477019	38593.5		2637.93	6678.26	617.496
74.0741	30223.2	1700.3		103.704	241.786	49.3086		16259.3	691223	18322.4		20811.9	7603.45	256.514
57.9458	15704.4	1333.37		75.3296	392.61	50.6679		2749.65	623864	38539.6		3574.55	15596.6	1464.5
114.384	10004	710.051		148.699	170.068	31.2422		2173.29	366146	23849.5		2825.28	6224.49	1049.38
105.243	35649.5	759.914		136.816	499.093	36.4759		2870.26	1206248	33562		3731.34	16887.5	1610.98
322.234	14779.8	1690.39		451.128	251.256	81.1388		6802.72	526160	47128.2		9523.81	8944.72	2262.15
								1619.05	416150	14999.4		2266.67	3329.2	434.983
Extended Data Fig. 2b
No. TMBP cells/g				Absolute No. TMBP cells				No. recruited CD4+ T cells/g				Absolute No. recruited CD4+ T cells
Br Parenchyma	Br Leptomeninges	Br Dura		Br Parenchyma	Br Leptomeninges	Br Dura		Br Parenchyma	Br Leptomeninges	Dura summa		Br Parenchyma	Br Leptomeninges	Br Dura Summa
687.385	68864.8	3012.11		900.474	888.355	79.8208		7687.85	1199084	62444		10071.1	15468.2	1654.77
3448.28	173842	12322.8		4413.79	3302.99	283.424		14439.7	2727739	227394		18482.8	51827.1	5230.06
4988.94	32179.2	620.126		6445.71	579.226	16.7434		29686	978991	41217.9		38354.3	17621.8	1112.88
9169.36	57365.1	5719.73		12837.1	1147.3	183.031		51394.7	2157511	94604.3		71952.5	43150.2	3027.34
4200.63	122387	12090.4		5708.66	2325.36	411.075		28115.3	1766306	214770		38208.7	33559.8	7302.19
6870.93	123958	6050.49		9007.78	2355.21	205.716		28403.8	1758789	135890		37237.3	33417	4620.27
No. TMBP cells/g				Absolute No. TMBP cells				No. recruited CD4+ T cells/g				Absolute No. recruited CD4+ T cells
SC Parenchyma	SC Leptomeninges	SC Dura		SC Parenchyma	SC Leptomeninges	SC Dura		SC Parenchyma	SC Leptomeninges	SC Dura		SC Parenchyma	SC Leptomeninges	SC Dura
116985	105079	1162.6		46793.9	4203.15	16.6251		837786	1605079	39528.2		335114	64203.2	565.254
119615	63180.1	2251.19		47846	2211.3	49.7512		489711	895753	31516.6		195884	31351.3	696.517
64790.5	162383	0		25268.3	4871.48	0		437148	1613219	25141.5		170488	48396.6	643.623
115202	101110	14749.3		40896.6	3033.29	333.333		650939	1401562	154867		231083	42046.9	3500
200349	49117.8	7320.84		93362.4	1964.71	139.096		1349917	529566	128115		629061	21182.6	2434.18
277213	101216	2750.28		137221	4048.66	49.505		1289340	949392	48954.9		638224	37975.7	881.188
Extended Data Fig. 2c
No. 2D2 T cells/g				Absolute No. 2D2 T cells				No. recruited CD4+ T cells/g				Absolute No. recruited CD4+ T cells
Br Parenchyma	Br Leptomeninges	Br Dura		Br Parenchyma	Br Leptomeninges	Br Dura		Br Parenchyma	Br Leptomeninges	Br Dura		Br Parenchyma	Br Leptomeninges	Br Dura
5121.33	192732	24323.7		1847.27	481.829	97.2947		15615.1	2429977	89139		5632.38	4859.95	356.556
10297	699653	91235.4		4271.19	1399.31	456.177		28638.5	2358918	385543		11879.2	7076.75	1927.72
4855.78	477661	59261.6		694.318	1910.64	320.013		13293.5	1281169	161623		3523.62	5124.67	2521.19
57049.7	1073003	69441		1725.26	5794.22	999.951		131036	3651550	210923		42875	19718.4	872.762
12784	463368	806.148		3946.43	3475.26	58.4457		29892.1	1281606	2418.44		9227.68	9612.05	175.337
13029.8	580638	925.645		3459.41	3541.89	35.915		52340	2629661	1666.91		13896.3	16040.9	64.6761
4909.01	790688	38037.9		1718.15	1818.58	467.866		50156.8	6405613	278152		17554.9	14732.9	3421.27
4296.47	780654	868.981		1453.07	2654.22	14.8596		24433.4	10191708	8255.32		8263.39	34651.8	141.166
No. 2D2 T cells/g				Absolute No. 2D2 T cells				No. recruited CD4+ T cells/g				Absolute No. recruited CD4+ T cells
SC Par	SC Leptomeninges	SC Dura		SC Par	SC Leptomeninges	SC Dura		SC Parenchyma	SC Leptomeninges	SC Dura		SC Parenchyma	SC Leptomeninges	SC Dura
190231	978821	11418.3		21762.4	19576.4	114.183		424006	2987965	36373.3		48506.3	59759.3	363.733
251857	140074	5870.97		33799.2	3782.01	117.419		577548	539903	30088.7		77507	15050	601.774
388159	307829	27094.9		54342.3	9850.51	2438.54		739185	978913	575970		103486	31325.2	5183.73
302761	666821	0		24584.2	32607.6	0		674225	1959685	1068.41		54747.1	95828.6	122.312
134494	1340044	1561.5		18721.5	78928.6	43.722		339772	4226064	3643.5		47296.2	248915	102.018
57391.6	629378	0		7759.35	31468.9	0		198782	2217259	2646.17		26875.3	110863	68.8004
22842	361682	8688.73		3133.93	9042.04	21.7218		151752	3551898	46339.9		20820.3	88797.4	115.85
43540.4	294531	8317.34		5608.01	5890.62	29.1107		226904	2925725	49904		29225.2	58514.5	174.664
Extended Data Fig. 2d
No. TMOG cells/g				Absolute No. TMOG cells				No. recruited CD4+ T cells/g				Absolute No. recruited CD4+ T cells
Br Parenchyma	Br Leptomeninges	Br Dura		Br Parenchyma	Br Leptomeninges	Br Dura		Br Parenchyma	Br Leptomeninges	Br Dura		Br Parenchyma	Br Leptomeninges	Br Dura
17164	385541	2414.15		6179.03	2698.79	16.899		32469.1	938728	8767.41		11688.9	6571.09	61.3718
283359	308908	4777.07		104588	926.724	33.4395		438483	1039272	22529.6		161844	3117.82	157.707
22968.6	284288	9431		8934.78	1990.01	470.072		45497.1	858213	151095		17698.4	6007.49	160.327
10986.8	74921.1	67153.1		3856.37	224.763	217.391		26988.5	208990	56710.8		9472.98	626.972	1057.66
46717.3	496657	54347.8		17378.9	993.314	47.155		68921.4	1084050	32065.4		25638.8	2168.1	226.843
45437.2	7230769	203694		16021.1	7230.77	1425.86		71479.6	12673077	495654		25203.7	12673.1	3469.58
212391	2943342	322482		78797.1	5886.68	2257.37		331606	6049936	1002984		123026	12099.9	7020.89
No. TMOG cells/g				Absolute No. TMOG cells				No. recruited CD4+ T cells/g				Absolute No. recruited CD4+ T cells
SC Parenchyma	SC Leptomeninges	SC Dura		SC Parenchyma	SC Leptomeninges	SC Dura		SC Parenchyma	SC Leptomeninges	SC Dura		SC Parenchyma	SC Leptomeninges	SC Dura
987536	1677342	796.686		100136	33546.8	9.56023		1410635	3822180	4381.77		143038	76443.6	52.5813
154600	1590168	0		17377	27032.9	0		197492	3137697	954.198		22198.1	53340.8	9.54199
570968	2510005	2420.6		79650	48519.9	29.0472		858064	4697561	4357.09		119700	93951.2	52.285
1390868	1540244	1890.36		175667	40160.1	18.9036		1747163	7129826	19848.8		220667	93662.2	198.488
469711	2854113	520.021		61860.9	30804.9	4.68019		621785	5509543	6240.25		81889.1	114077	56.1623
2134342	3991003	57489.6		268927	47892	172.469		2564207	7496787	137336		323090	89961.4	412.009
794530	5011861	28589.6		99951.8	50118.6	114.358		1206690	15416058	69091.5		151802	154161	276.366
