# Supplementary material for: Distinct roles of the meningeal layers in CNS autoimmunity
Source: Springer Nature journal article supplement (doi:10.1038/s41593-022-01108-3), 2022-06-30
Supplement: MOESM23 [file 41593_2022_1108_MOESM23_ESM.xlsx]

## Sheet: Tabelle1
Extended Data Fig. 3a
Br Leptomeninges	52.067	39.7	13.764	50.989	14.137	25.387	15.352	38.249	17.745	18.33	53.315	46.21	52.412	61.981	7.183	47.193	24.406	11.057	10.128	22.727	26.052	23.61	46.118	28.967	34.596	25.529	20.038	20.552	36.953	39.774
Br Dura	20.573	29.378	34.234	48.149	49.768	39.938	17.48	15.609	11.72	17.06	40	40.268	51.761	27.02	29.637	36.916	27.341	12.404	20.458	33.96	16.992	36.601	13.416	42.332	25.057	52.478	33.519	34.325	26.992	25.615
Extended Data Fig. 3b
Ccr6	Ccr7	Cxcr3	Cxcr4	Cxcr6	Itga4	Itgal	Itgb1	Itgb2	Itgb7	Sell	Selp	Selplg
854.654	52.5941	5760.7	1518.66	9545.01	21018.7	13807.6	41864.9	8599.96	17259.9	318.852	13.1485	2881.99
839.178	86.2122	5927.78	1392.6	11560.1	17841.7	13895.5	46501.7	8287.49	19732.9	389.345	6.25733	2562.73
825.079	116.907	5720.89	1225.42	10398.9	20229.2	13282.9	43380.2	7971.56	17149.2	418.007	5.88742	2539.16
1211.01	134.706	5500.73	1527.57	11252.7	18631.9	12269.7	54089.2	7076.12	15178.7	460.695	18.8589	2079.19
Extedend Data Fig. 3c
Cldn5		Ocln		Cxcl11		Cx3cl1		Fn1		Icam1
Br Leptomeninges	Br Dura	Br Leptomeninges	Br Dura	Br Leptomeninges	Br Dura	Br Leptomeninges	Br Dura	Br Leptomeninges	Br Dura	Br Leptomeninges	Br Dura
0.539	0.0284	0.539	0.0284	0.01283	0.00168059	0.0317279	0.0061049	0.555402	0.0717631	0.0287883	0.014817
0.268	0.0603	0.268	0.0603	0.0156662	0.00737771	0.0328285	0.00551178	0.656513	0.0597394	0.0210761	0.0157876
0.623	0.0411	0.623	0.0411	0.00805	0.007557	0.027835	0.003116	0.531277	0.071541	0.025904	0.007324
not detected	not detected	not detected	not detected	not detected	0.00520853	0.015961	0.003821	0.264965	0.097877	0.005033	0.009497
Extedend Data Fig. 3d
(% reduction from t0)	Br Leptomeninges	Br Dura
	5.46	40
	0	16
	6.72	56
	13.19	24.75
	10.42	20.79
	12.5	12.87
		48.53
		26.47
		67.65
		65.22
		30.43
		26.09
Extedend Data Fig. 3e
	Crawling (%)				Rolling (%)				Fast Rolling (%)
Time after IFNg and TNFa application
0 (min)	8.7	0	0	0	47.83	22.73	55.17	30	43.48	77.27	44.83	70
210 (min)	10.58	18.82	14.81	3	50.96	37.65	44.44	47	38.46	43.53	40.74	50
Total cell number (pooled)
Time after IFNg and TNFa application	Crawling	Rolling	Fast Rolling
0 (min)	2	35	47
210 (min)	31	109	100
Extedend Data Fig. 3f
Time (min)	No. intravascular TOVA cells/time interval
0	23	22	29	10
30	0	24	17
90	0	29	20
150	44		29
210	104	85	27	24
Time (min)	No. extravascular TOVA cells/time interval
0	3	6	2	1
30	6	7	4
90	5	5	8
150	8		17
210	35	26	48	7
