# Supplementary material for: Distinct roles of the meningeal layers in CNS autoimmunity
Source: Springer Nature journal article supplement (doi:10.1038/s41593-022-01108-3), 2022-06-30
Supplement: MOESM24 [file 41593_2022_1108_MOESM24_ESM.xlsx]

## Sheet: Tabelle1
Extended Data Fig. 4a
Ifng	Br par D0	Br lepto D0	Br dura D0		Br Par d3	Br Lepto d3	Br Dura d3		Il17	Br par D0	Br lepto D0	Br dura D0		Br Par d3	Br Lepto d3	Br Dura d3
	1.54233e-05	3.85662e-05	1.76751e-05		0.0513	0.0256	0.00252			0	2.97446e-05	2.39237e-05		0.00665	0.00305	0.000312
	5.81e-06	4.99782e-05	7.89617e-05		0.0588	0.016	0.000736			0	2.16834e-05	4.78993e-05		0.0073	0.00397	0.000233
	5.82e-06	5.58e-05	0.000112		0.116	0.00997	0.00111			0	2.17e-05	not detected		0.0137	0.000959	0.00021
	0	4.80642e-05	3.12e-05		0.101	0.0102	0.000988			0	9.10684e-06	0.000117248		0.016	0.00134	0.000164
	0	3.28538e-05	0.00020417		0.0609	0.0154	0.0019			0	1.41679e-05	8.88e-05		0.00923	0.00173	0.000491
	0	4.05e-05	0.000144		0.173	0.00991	0.0041			0	9.83e-06	1.29e-06		0.0233	0.00152	0.000495
					0.0785	0.0142	0.00226							0.0116	0.0024	0.000157
					0.0245	0.0073	0.00046							0.00503	0.00122	5.52e-05
					0.0188
Cxcl9	Br par D0	Br lepto D0	Br dura D0		Br Par d3	Br Lepto d3	Br Dura d3		Cxcl10	Br par D0	Br lepto D0	Br dura D0		Br Par d3	Br Lepto d3	Br Dura d3		Cxcl11	Br par D0	Br lepto D0	Br dura D0		Br Par d3	Br Lepto d3	Br Dura d3
	1.35135e-05	0.000728304	0.000583214		0.082156	0.026743	0.008019			4.53407e-05	0.00126927	0.000372173		0.047346	0.011439	0.007562			7.38618e-06	0.0012163	0.000222239		0.021333	0.036301	0.013301
	2.07e-05	0.000827373	0.00022		0.087923	0.020742	0.004073			7.16e-05	0.00269829	0.000345091		0.036071	0.013322	0.004229			1.66e-05	0.00214324	7.55e-05		0.016576	0.020785	0.003178
	2.53e-05	0.000701	not detected		0.06595	0.029504	0.003934			5.25e-05	0.001413	not detected		0.064405	0.014751	0.003686			2.76e-05	0.001645	not detected		0.02196	0.029502	0.001967
	2.18372e-05	0.000759595	0.00025		0.070685	0.027179	0.004639			7.08977e-05	0.0020776	0.000334555		0.06986	0.015832	0.004028			0.000126335	0.00180173	0.00236643		0.022657	0.025641	0.002376
	not detected	0.000666723	0.000754645		0.077332	0.020032	0.029079			4.28636e-05	0.00155188	0.000526134		0.077671	0.015661	0.01288			not detected	0.00139389	0.00582537		0.024899	0.022908	0.030474
	2.58e-05	0.00048	0.000353		0.114825	0.032702	0.00494			8.52e-05	0.001117	0.000413		0.101172	0.016905	0.005257			3.22e-05	0.001103	0.002816		0.028032	0.032588	0.004699
					0.126808	0.036512	0.006582							0.077478	0.020346	0.005813							0.024926	0.041535	0.003981
					0.140653	0.032252	0.00375							0.110231	0.019711	0.00444							0.027322	0.043031	0.006842
Extended Data Fig. 4b
	Br Parenchyma	Br Parenchyma	Br Parenchyma	Br Parenchyma	Br Parenchyma	Br Parenchyma	Br Parenchyma	Br Parenchyma	Br Leptomeninges	Br Leptomeninges	Br Leptomeninges	Br Leptomeninges	Br Leptomeninges	Br Leptomeninges	Br Leptomeninges	Br Leptomeninges	Br Dura	Br Dura	Br Dura	Br Dura	Br Dura	Br Dura	Br Dura	Br Dura	Blood	Blood	Blood	Blood	Blood	Blood	Blood	Blood
IFNγ+	15.78	19.3	16.04	24.66	22.64	34.4	30.25	31.3	38.98	40.74	38.14	36.08	35.5	18.98	19.97	22.88	17.6	18.05	20.23	14.75	8.98	3.61	12	8.43	1.92	5.75	2.94	12.95	50	50	25
IL-17+	3.74	3.16	3.74	2.18	3.77	3.19	4.02	2.39	0.84	0.22	0.64	0.56	1.12	1.66	2.17	1.38	0.91	0.29	0.46	0.12	0.93	3.61	0	0	0	1.15	0	0	0	2.63	0
IL-17+ IFNγ+	31.86	48.64	32.6	35.12	5.66	20.27	26.1	21.17	5.74	2.52	3.56	8.44	13.66	9.74	6.5	9.4	5.69	7.11	7.46	7.01	1.55	2.41	0	0	0	0	0	0.52	6.67	2.63	0
Extended Data Fig. 4c
Sorted TMBP cells
Ifng	SC Leptomeninges	SC Dura			Il17	SC Leptomeninges	SC Dura
	0.0605	0.0144	Pooled sample			0.0149	0.00515	Pooled sample
	0.0778					0.0176
	0.0453	0.0184	Pooled sample			0.0108	0.0019	Pooled sample
	0.0583					0.00843
	0.032	0.00852	Pooled sample			0.00964	0.00279	Pooled sample
	0.0396					0.0099
	0.014	0.015	Pooled sample			0.017	0.0106	Pooled sample
	0.0272					0.00341
	0.00605	0.0021				0.0112	0.000771
	0.0217	0.00799				not detected	0.00385
Total tissue
Ifng	SC Leptomeninges	SC Dura			Il17	SC Leptomeninges	SC Dura
	0.126	0.00025				0.0123	1.88e-05
	0.0245	0.00207				0.00618	0.000213
	0.275	0.00124				0.0438	0.000164
	0.0379	0.00736				0.0236	0.00143
	0.0339	not detected				0.0194	not detected
	0.0946	0.00139				0.0656	0.000524
	0.0331	0.0148				0.0111	0.00495
	0.426	0.00137				0.0819	0.000101
	0.00803	0.000271				0.00806	5.31e-05
	0.0115	not detected				0.00703	not detected
