# Supplementary material for: Distinct roles of the meningeal layers in CNS autoimmunity
Source: Springer Nature journal article supplement (doi:10.1038/s41593-022-01108-3), 2022-06-30
Supplement: MOESM25 [file 41593_2022_1108_MOESM25_ESM.xlsx]

## Sheet: Tabelle1
Extended Data 5a
qPCR
Ifng	Br Dura	Br Dura	Br Dura	Br Dura	Br Leptomeninges	Br Leptomeninges	Br Leptomeninges	Br Leptomeninges	Br Leptomeninges	Br Leptomeninges	Br Leptomeninges	Br Leptomeninges	Br Leptomeninges	Br Leptomeninges	Br Leptomeninges	Br Leptomeninges
SYN	0.0038	0.002155			0.001831	0.001641	0.002186	0.002263	0.00261	0.003366
Ct	0	3.81e-05	8.25e-05	1.68e-05	0.001188	0.000993	0.001568	0.001526	0.000582	0.00162	0.000445	0.000211	0.000256	0.000163	8.27e-05	0.000454
Il17a	Br Dura	Br Dura	Br Dura	Br Dura	Br Leptomeninges	Br Leptomeninges	Br Leptomeninges	Br Leptomeninges	Br Leptomeninges	Br Leptomeninges	Br Leptomeninges	Br Leptomeninges	Br Leptomeninges	Br Leptomeninges	Br Leptomeninges	Br Leptomeninges
SYN	0.002939	0.004286			0.002964	0.003821	0.003872	0.002422	0.00177	0.003156
Ct	5.73e-05	0.000107	6.97e-05	1.08e-05	0.000595	0.000449	0.000485	0.000592	0.000645	0.000654	0.000208	0.000133	0.000171	0.000355	0.000166	0.000219
FACS
CD134 (Ox40)	Br Dura	Br Dura	Br Dura	Br Dura	Br Dura	Br Dura	Br Dura	Br Leptomeninges	Br Leptomeninges	Br Leptomeninges	Br Leptomeninges	Br Leptomeninges	Br Leptomeninges	Br Leptomeninges	Br Leptomeninges	Br Leptomeninges	Br Leptomeninges	Br Leptomeninges	Br Leptomeninges	Br Leptomeninges	Br Leptomeninges	Br Leptomeninges	Br Leptomeninges
SYN	436	790	529	77.7				320	359	343.333	396.333	450	219.333	284	220.75
Ct	13.9	4.88	24.3	15.6	7.9	4.15	19.9	51.7	48.8	85.25	65.5	69.65	50.5667	53.5667	58.3	24.4	37.5	59.5	43.2	45.25	42	40	42.1
IL2R	Br Dura	Br Dura	Br Dura	Br Dura	Br Dura	Br Dura		Br Leptomeninges	Br Leptomeninges	Br Leptomeninges	Br Leptomeninges	Br Leptomeninges	Br Leptomeninges	Br Leptomeninges	Br Leptomeninges	Br Leptomeninges	Br Leptomeninges	Br Leptomeninges	Br Leptomeninges	Br Leptomeninges	Br Leptomeninges	Br Leptomeninges	Br Leptomeninges
SYN	769	61.5	513					628	880	369	527.5	552	448	333.75	353
Ct	34.4	29.7	25.9	21.2	1.96	13.7		71.2333	85.2	50.3	42.8	52.7	41.65	39.8	43	36	24.55	17.7	19.3	22	18.1	21.1	23.8
Extended Data Fig. 5b
Percentages FoxP3+ cells
Total CD4+ T cells (%)	Br par	Br Lepto	Br Dura		TbSYN cells	Br par	Br Lepto	Br Dura		CD4+ GFP- T cells (%)	Br par	Br Lepto	Br Dura
	10.6288	7.80272	4.95105			0.398183	0.836735	0.49887			10.2306	6.96599	4.45218
	12.5189	4.33299	5.74896			0.327664	0.310591	0.596189			12.1912	4.0224	5.15277
	9.44688	0.213957	3.56707			0.593143	0.109721	0.396341			8.85374	0.104235	3.17073
	5.77387	0.320462	0.662139			0.440113	0.0998161	0.305603			5.33375	0.220646	0.356536
	6.87618	0.219892	0.624965			0.204136	0.214254	0.439164			6.67204	0.00563825	0.1858
	10.3737	1.44475	3.51478			0.706061	0.976181	1.54057			9.66761	0.468567	1.97421
Total numbers FoxP3+ cells
Total CD4+ T cells (%)	Br Parenchyma	Br Leptomeninges	Br Dura		TbSYN cells	Br Parenchyma	Br Leptomeninges	Br Dura		CD4+ GFP- T cells (%)	Br Parenchyma	Br Leptomeninges	Br Dura
	12510	41203	430			415	3373	76			10653	28081	676
	4514	27030	1283			130	902	80			4829	11681	691
	7344	4269	2107			501	302	115			7474	287	921
	4942	3691	220			249	315	26			3014	695	30
	7727	874	1612			148	62	201			4847	2	85
	8342	548	1131			458	200	69			6273	115	247
Extended Data Fig 5c
	MHCIIhigh	MHCIIhigh	MHCIIhigh	MHCIIlow	MHCIIlow	MHCIIlow
Br Par	0.005213	0.005236	0.004731	0.994787	0.994764	0.995269
Br Lepto	0.406592	0.447237	0.410615	0.593408	0.552763	0.589385
Br Dura	0.448544	0.475748	0.44725	0.551456	0.524252	0.55275
Extended Data Fig 5d
CD134(Ox40)	Br Parenchyma	Br Parenchyma	Br Parenchyma	Br Parenchyma	Br Parenchyma	Br Parenchyma	Br Parenchyma	Br Parenchyma	Br Leptomeninges	Br Leptomeninges	Br Leptomeninges	Br Leptomeninges	Br Leptomeninges	Br Leptomeninges	Br Dura Sinus	Br Dura Sinus	Br Dura Sinus	Br Dura Sinus	Br Dura Sinus	Br Dura Sinus	Br Dura Sinus	Br Dura Hemisphere	Br Dura Hemisphere	Br Dura Hemisphere	Br Dura Hemisphere	Br Dura Hemisphere	Br Dura Hemisphere	Br Dura Hemisphere	dcLN	dcLN	dcLN	dcLN	dcLN	dcLN	dcLN	ingLN	ingLN	ingLN	ingLN	ingLN	ingLN	ingLN
bSYN	212947	160715	160715	129622					185951	114035	131887	92996	85016	105678	113641	84431	95601	168719				98280	64331	112079	180854				82418	53458	70830	159603	134658			113248	39593	182749	113248	118051
Ct	111306	122209	142833	232292	97266	106412	127396	180227	39728	68201	41666	73816	85604	83562	12804	12080	6226	5842	15266	17410	1168	10934	11075	4264	4481	13842	15620	1305	9474	11622	3733	7845	10692	1015	1227	12804	18113	1023	13574	23240	923	873
IL2R	Br Parenchyma	Br Parenchyma	Br Parenchyma	Br Parenchyma	Br Parenchyma	Br Parenchyma	Br Parenchyma	Br Parenchyma	Br Leptomeninges	Br Leptomeninges	Br Leptomeninges	Br Leptomeninges	Br Leptomeninges	Br Leptomeninges	Br Dura Sinus	Br Dura Sinus	Br Dura Sinus	Br Dura Sinus	Br Dura Sinus	Br Dura Sinus	Br Dura Hemisphere	Br Dura Hemisphere	Br Dura Hemisphere	Br Dura Hemisphere	Br Dura Hemisphere	Br Dura Hemisphere	dcLN	dcLN	dcLN	dcLN	dcLN	dcLN	ingLN	ingLN	ingLN	ingLN	ingLN
bSYN	19161	22031	19161	22031					99647	122633	93317	113641	33758	42963	17583	16901	8120				14871	14207	9810				11473	9534	7629				12846	12041	11622
Ct	6888	6303	6974	5402	7237	8782	5931	6639	5600	5842	5103	5180	4301	3690	2566	2436	2222	2067	2538	2630	2449	2410	2111	2007	2410	2277	2718	2430	2181	2140	2423	2326	2078	1863	1003	2169	1711
Extended Data Fig 5e
CD134(Ox40)	Br Parenchyma	Br Parenchyma	Br Parenchyma	Br Parenchyma	Br Parenchyma	Br Parenchyma	Br Parenchyma	Br Parenchyma	Br Parenchyma	Br Parenchyma	Br Parenchyma	Br Parenchyma	Br Parenchyma	Br Leptomeninges	Br Leptomeninges	Br Leptomeninges	Br Leptomeninges	Br Leptomeninges	Br Leptomeninges	Br Leptomeninges	Br Leptomeninges	Br Dura Sinus	Br Dura Sinus	Br Dura Sinus	Br Dura Sinus	Br Dura Hemisphere	Br Dura Hemisphere	Br Dura Hemisphere	Br Dura Hemisphere	dcLN	dcLN	dcLN	dcLN	dcLN	dcLN	dcLN	dcLN	ingLN	ingLN	ingLN	ingLN	ingLN	ingLN	ingLN	ingLN
MBP	302057	390533	206204	219425	134200	107705	197214	199239	184820	178902	172441	157949		87330.2	107198	89343.5	99453.5	185651	161055	175599	159294	111032	140966	38408.1	55439.9	50437.4	65078.2	44014.8	39124.1	66878.8	83241.5	30680.3	36688.9	55341.7	43854.6	29118.6	26338.2	41828.6	49295.5	44025.6	49807.4	66243.8	63701.1	57853	52711.9
Ct	59036.9	52011.8	59730.9	44943.6	87624.8	77846.8	88481.9	70176.5	58605.5	69126.3	50727	51536.7	65727.5	47111.4	37499	49669.6	42628.9	28794.3	24767.2	25401.3	19427.4	10406.2	11795	6957.8		12094.5	10908.4	5546.5		21981.1	18923.8	6920.6	8388	14836	12591.6	8277.7	7641.4	4664	4067.1	4394.9	4481.2	7528.3	7607	5075.1	5746.6
IL2R	Br Parenchyma	Br Parenchyma	Br Parenchyma	Br Parenchyma	Br Parenchyma	Br Parenchyma	Br Parenchyma	Br Parenchyma	Br Parenchyma	Br Parenchyma	Br Parenchyma	Br Parenchyma	Br Parenchyma	Br Parenchyma	Br Parenchyma	Br Parenchyma	Br Parenchyma	Br Parenchyma	Br Leptomeninges	Br Leptomeninges	Br Leptomeninges	Br Leptomeninges	Br Leptomeninges	Br Leptomeninges	Br Leptomeninges	Br Leptomeninges	Br Dura Sinus	Br Dura Sinus	Br Dura Sinus	Br Dura Hemisphere	Br Dura Hemisphere	Br Dura Hemisphere	dcLN	dcLN	dcLN	dcLN	dcLN	dcLN	dcLN	dcLN	ingLN	ingLN	ingLN	ingLN	ingLN	ingLN	ingLN	ingLN
MBP	41159.5	30664.4	52649.7	57526.6	47088.6	34281.1	68762.5	79483.6	102436	76652.4	92868.3	74587							86387.9	75023	69729.6	54336.2	152513	160799	143586	148672	33221.7	30113.4	10389.6	8570.7	13705	11229.8	9490.5	9210.8	6592.5	7140.6	9875.4	9248.6	12080	10364.9	12697.4	11628.8	9840.8	8317.7	20140	21084.2	27756.4	20263.9
Ct	16174.1	15721.3	17800.9	17940.1	16985.6	16683.4	13772.3	12759.8	7292.3	28004.8	30566.5	26304.9	33602.4	26038.1	27226.1	23782.1	25225.6	22218.8	27595.3	26108.3	30096.9	33155.4	15298.6	12946.2	13705	11229.8	3464.1	5248	4657.7	2620.6	3158.6	4575	3964	4310.5	4110.9	4055.9	5708.1	5041.5	5935.5	4604.2	3685.4	3465.8	3080.1	3262.3	5882.2	5580	5725.7	4844.9
Extended Data Fig 5g
Ifng	Br Dura						Br Leptomeninges
OVA	0.0273959	0.00219814	0.00235	0.008215	0.0201	0.0025446	9.8e-05	0.00146207	0.00061	1.39e-05	0.000777	0.000128
PBS	9.3e-05	4.3e-06	5.5e-07	1.7e-08	0.00286		1.54e-05	1.73e-05	0	5.62e-06	1.2e-05
Il17a
OVA	0.0147788	0.0102214	0.0005655	0.00263	0.00421	0.00424129	7e-06	0.00168684	6.13e-05	1.19e-06	0.000134	9.79e-06
PBS	1.3275e-05	6.3e-06	7.75271e-05	5.54e-05	ND		1.46e-06	4.37e-06	0.000236	7.9e-06	1.21e-05
