# Supplementary material for: Distinct roles of the meningeal layers in CNS autoimmunity
Source: Springer Nature journal article supplement (doi:10.1038/s41593-022-01108-3), 2022-06-30
Supplement: MOESM26 [file 41593_2022_1108_MOESM26_ESM.xlsx]

## Sheet: Tabelle1
Extended Data Fig. 6b
BrPar PBS	BrPar 10 μg OVA	BrPar 25 μg OVA	brLepto PBS	brLepto10 μg OVA	brLepto 25 μg OVA	brDura PBS	brDura 10 μg OVA	brDura 25 μg OVA	dcLNs PBS	dcLNs 10 μg OVA	dcLNs 25 μg OVA	ingLN PBS	ingLns 10 μg OVA	ingLNs 25 μg OVA	ingLn PBS + OVA
0.301643	1.65163	1.30468	0.483842	2.78484	2.51475	0.12451	0.920536	1.701	0.15002	1.05197	1.20561	0.295294	0.276584	0.0554708	2.78484
0.358039	1.12218	0.697683	0.467667	2.57636	3.66147	0.130822	0.90398	1.11816	0.0848893	1.43287	0.738227	0.139729	0.216172	0.17499	2.31343
0.282355	2.36208	2.24612	0.188379	4.51086	4.07539	0.0541203	0.0918487	1.24303	0	0.305048	0.518126	0.105406	0.0762903	0.0618331	1.37041
0.300822	1.82878	2.36208	0.129252	3.99418	0.374251	0.0810266	0.661843	0.826213	0	0.0839221	0.272475	0.125688	0.0402039	0.0168139	1.92169
Extended Data Fig. 6c
BrPar PBS	BrPar 10 μg OVA	brLepto PBS	brLepto10 μg OVA	brDura PBS	brDura 10 μg OVA	dcLNs PBS	dcLNs 10 μg OVA	ingLN PBS	ingLns 10 μg OVA	Blood PBS	Blood 10 μg OVA
1.66279	0.991993	0.455547	6.13773	0.569497	2.49421	0.619675	1.08767	1.83912	0.4147	1.98931	0.053503
0.798449	0.83992	1.19251	4.5994	1.52622	0.904284	1.35679	2.79436	0.336127	0.873892	0.496497	0.028635
0.538765	1.11863	1.35194	9.24227	1.20046	1.832	1.02354	3.12226	0.824755	0.718918	0.633334	0.033041
	1.61303		6.83965		3.35034		1.3471		0.183515		0.066716
Extended Data Fig. 6e
10 ug	Br Par PBS	Br Par OVA	Br Lepto PBS	Br Lepto OVA	Br Dura PBS	Br Dura OVA	dcLN PBS	dcLN OVA	ingLN PBS	ingLN OVA	Blood PBS	Blood OVA
	0.615303	3.21406	0.646403	2.05277	0.491628	1.10311	1.76456	1.41735	1.88948	1.97553	0.224193	0.001997
	1.31976	3.23061	1.64847	5.29857	0.97849	0.31775	1.81778	1.32666	1.57819	2.4221	0.713426	0.003606
	0.96676	1.19086	0.627893	5.14544	1.50951	3.20231	0.010191	0.540042	0.5381	0.265651	1.30613	2.17752
	1.3847	3.05747	1.3536	2.07398	1.50837	1.44008	0.366796	0.898913	0.409528	0.30189	0.553945	3.23771
	0.680244	3.70154	0.351528	7.76455	1.02151	0.560359	1.06145	0.877173	0.921359	0.405301	1.19128	0.22831
	1.03324	1.36445	1.37211	1.58761	0.490486	1.56499	0.979225	0.939869	0.663339	0.629533	2.01102	0.35086
25 ug	Br Par PBS	Br Par OVA	Br Lepto PBS	Br Lepto OVA	Br Dura PBS	Br Dura OVA	dcLN PBS	dcLN OVA	ingLN PBS	ingLN OVA	Blood PBS	Blood OVA
	0.55138	2.34	1.5712	12.6	1.17517	0.0912	0.147231	0.029601	0.1406	0.078016	0.020685	0.404965
	0.816653	1.01	0.150081	1.88	0.235484	1.65	0.171895	0.182109	0.152366	0.074142	0.030271	0.586652
	1.48854	0.11	1.01049	13.5287	1.62558	2	0.062264	0.065036	0.058855	0.06178	0.005827	0.383838
	3.37655	1.39	0.573251	2.43643	0.71831	0.472	0.837656	1.40351	1.31083	2.24941	0.409505	0.109502
	0.99	2.81	0.84	2.45	0.79	0.33	3.62611	2.86639	1.20365	1.48824	1.07123	4.26441
	0.58	0.42	1.74		1.54	0.86	1.15485	1.45335	3.1337	2.04841	4.46249	0.250631
Extended Data Fig. 6f-g
DQOVA+ CD11b+ cells/g								Absolute No.DQOVA+ CD11b+ cells								%DQOVA+ CD11b+ cells
	ICV	ICV	ICV	ICM	ICM	ICM			ICV	ICV	ICV	ICM	ICM	ICM			ICV	ICV	ICV	ICM	ICM	ICM
Br Par	3835.65	866.356	1188.86	367.857	157.595	128.702		Br Par	5369.91	1209	1750	515	205	172.5		Br Par	0.543034	0.577364	0.481431	0.285319	0.132472	0.101173
Br Lepto	2398500	315219	791678	848443	484525	422521		Br Lepto	4797	4696.76	11796	14169	8673	5028		Br Lepto	0.756386	0.606801	0.717649	0.752909	0.517637	0.357967
Br Hem	22310.8	23928.6	41963.3	44301.6	25899.3	7714.29		Br Hem	334.661	201	532.934	544.91	360	108		Br Hem	0.282116	0.290043	0.34902	0.47769	0.316623	0.170616
Br Sin	30333.3	6149.07	59698.3	17907.3	16458.3	9375		Br Sin	273	70.7143	519.375	159.375	148.125	84.375		Br Sin	0.425234	0.292035	0.525617	0.590278	0.296992	0.254237
dcLN	35294.1	12000	21162.8	14196.4	5225.81	4318.18		dcLN	480	138	273	159	81	57		dcLN	0.053637	0.057716	0.060106	0.10664	0.079412	0.052925
ingLN	3943.66	9500	7588.23	3904.59	8333.33	9732.82		ingLN	84	228	129	101.519	202.5	127.5		ingLN	0.015766	0.009931	0.010675	0.015303	0.009952	0.027553
DQOVA+ CD11b- cells/g								Absolute No. DQOVA+ CD11b- cells								%DQOVA+ CD11b- cells
	ICV	ICV	ICV	ICM	ICM	ICM			ICV	ICV	ICV	ICM	ICM	ICM			ICV	ICV	ICV	ICM	ICM	ICM
Br Par	80.609	17.1981	54.3478	21.4286	9.60947	3.73051		Br Par	112.853	24	80	30	12.5	5		Br Par	0.035556	0.035242	0.04463	0.045113	0.023041	0.011976
Br Lepto	121500	21094.6	41275.2	54431.1	8044.69	15126		Br Lepto	243	314.31	615	909	144	180		Br Lepto	0.245455	0.133696	0.113826	0.188199	0.058896	0.085837
Br Hem	996.016	1071.43	942.996	1703.91	2589.93	857.143		Br Hem	14.9402	9	11.9761	20.9581	36	12		Br Hem	0.036496	0.057692	0.032258	0.075269	0.110092	0.070175
Br Sin	2666.67	745.342	2586.21	1053.37	416.667	208.333		Br Sin	24	8.57143	22.5	9.375	3.75	1.875		Br Sin	0.057554	0.071429	0.022018	0.05102	0.014925	0.035714
dcLN	2647.06	1304.35	930.233	1071.43	387.097	1136.36		dcLN	36	15	12	12	6	15		dcLN	0.000408	0.000572	0.000383	0.000594	0.000555	0.000627
ingLN	140.845	750	529.412	717.17	2160.49	572.519		ingLN	3	18	9	18.6464	52.5	7.5		ingLN	8.8e-05	0.000106	0.000116	0.000483	0.000315	0.000188
