# Supplementary material for: Distinct roles of the meningeal layers in CNS autoimmunity
Source: Springer Nature journal article supplement (doi:10.1038/s41593-022-01108-3), 2022-06-30
Supplement: MOESM27 [file 41593_2022_1108_MOESM27_ESM.xlsx]

## Sheet: Tabelle1
Extended Data Fig. 7a
bSYN-aEAE
No. TbSYN cells/g					Absolute No. TbSYN cells
dcLN	ingLN	medLN			dcLN	ingLN	medLN
17821.5	877837	Not collected			313.659	106218	Not collected
19373	971854	Not collected			236.35	96505.1	Not collected
25261	1052308	Not collected			479.96	131538	Not collected
10041	1039970	Not collected			106.435	131036	Not collected
72015.1	1688920	Not collected			496.904	202670	Not collected
27018.8	730120	Not collected			132.392	83233.7	Not collected
4146.4	836293	Not collected			15.7563	133807	Not collected
4065.7	1661366	Not collected			15.8562	191057	Not collected
16435	1432015	Not collected			108.471	97377.1	Not collected
485157	481637	1487221			7325.87	59578.5	28257.2
126509	526824	18716.8			2403.67	87031.2	213.371
90972.2	1587846	128125			1637.5	219123	1025
121552	1874471	133307			1884.06	349214	1653.01
8562.66	900622	191993			176.391	133472	4723.03
MBP-aEAE
No. TMBP cells/g					Absolute No. TMBP cells
dcLN	ingLN	paLN			dcLN	ingLN	paLN
37673.1	902510	1541635			599.002	77615.9	237103
214252	1518934	1541339			4070.8	94173.9	249697
127059	865721	1547778			2007.53	52809	128466
30959.8	821198	1167129			526.316	66106.4	125116
127835	3352513	1415668			2070.92	333910	97964.2
31770.2	4043127	1972389			501.969	214286	217752
MOG-aEAE
No. 2D2 T cells/g					Absolute No. 2D2 T cells
dcLN	scLN	ingLN	paLN		dcLN	scLN	ingLN	paLN
16370.5	135228	141931	3339605		36.0151	3948.66	809.006	14026.3
12154.1	252778	116220	3906899		8.50785	910	697.318	30083.1
26279.3	15146.5	126714	3190908		28.9072	15.1465	570.212	19464.5
31724.4	44214.2	3334030	6048410		60.2763	247.599	31339.9	38709.8
6076.39	180028	630144	2898574		7.29167	774.12	3087.71	18261
17312.2	256929	114162	2756250		29.4308	1233.26	445.234	19293.8
39977.7	90888.8	176264	9064700		43.9755	245.4	1498.24	71611.1
0	14155	1362.68	28499.7		0	58.0357	7.22222	159.598
36318.7	0	4481.43	0		7.26373	0	29.1293	0
MOG-tEAE
No. TMOG cells/g					Absolute No. TMOG cells
dcLN	ingLN	paLN			dcLN	ingLN	paLN
154272	404192	229128			123.418	3193.12	641.559
47978.5	712032	1136060			38.3828	5197.83	4317.03
4377.74	24879.1	79561.5			6.5666	119.42	222.772
7035.65	11770.2	5208.33			5.62852	56.4972	9.375
6597.22	19255				17.8125	100.126	0
0	797.533	0			0	3.19013	0
0	0	0			0	0	0
Extended Data Fig. 7c
Ifng	pooled samples			Il17a	pooled samples
dcLN	ingLN	Blood		dcLN	ingLN	Blood
0.000696	0.000328	0.000538		2.36e-06	7.25e-06	not detected
0.000234	0.000244	0.000182		6.5e-06	0	5.47e-06
0.000626	0.000891	0.000813		5.1e-06	1.64e-05	not detected
0.000657	0.000759	0.000563		4.5e-06	7.88e-06	1.22e-06
0.000611	0.00108	0.000338		3.29e-06	1.9e-07	7.92e-06
0.000686	0.000451	0.000283		1.13e-06	7.51e-06	3.38e-06
not detected	not detected	0.000326		not detected	not detected	4.28e-06
Extended Data Fig. 7d	Activation status in T cells in the periphery
bSYN-aEAE
TbSYN cells CD134 MFI
dcLN	ingLN	medLN	Spleen
173	286	Not collected	817
230	308	Not collected	468
207	297	Not collected	362
248	273	Not collected	339
230	299	Not collected	358
380	383	Not collected	305
too few cells	344	Not collected	324
401	317	Not collected	293
416	261	Not collected	309
61.6	123	92.5	103
68.1	147	73.2	97.7
71.9	151	84.8	103
73.2	153	121	97.7
MBP-aEAE
TMBP cells MFI
dcLN	ingLN	paLN	Spleen
166	1884	2346	75.8
250	2140	2457	213
194	1705	1150	230
483	1093	1209	164
65.5	402	544	91.2
52.6	378	639	82.2
MOG-aEAE
2D2 T cells CD44 MFI
dcLN	scLN	ingLN	paLN	Spleen
8448	5213	3561	1902	941
471	1594	2185	918	927
1478	2202	1939	2132	1523
5701	2270	1832	3145	1315
367	4099	2676	2639	723
396	3469	1976	2428	931
1591	3028	3182	2025	960
too few cells	1046	2168	6806	2849
2083	too few cells	2017	too few cells	3279
MOG-tEAE
%Nur77+ TMOG cells
dcLN	ingLN	paLN	Spleen
0		7.37	19.4
0	0	3.34	10.6
0	3.74	3.33	7.68
16.7	5	0	2.45
0	5.66	0	2.12
10	7.17	0	3.47
0	10.5	0	3.13
Extended Data Fig. 7e
% Lymphatic vessel area
Confluence of sinuses
AAV-Sham	0.208933	0.269796	0.141122	0.088748	0.087349	0.107024	0.066089	0.071053	0.092803	0.142706	0.048579	0.061177	0.085323	0.11243	0.048698	0.034184	0.03031	0.042667	0.208933
AAV-rVEGFR3	0.002375	0.009819	0.002847	0.002407	0.018436	0.000796	0.010187	0.003742	0.000794	0.009243	0.004035	0.001292	0.013996	0.006586	0.003301	0.000509	0.000194	0.000943	0.002375
Skull base
AAV-Sham	0.169854	0.038699	0.083362	0.163742	0.129888	0.07968	0.046928	0.027236	0.054814	0.048941	0.1127	0.034302
AAV-rVEGFR3	0.006962	0.000194	0.001118	0.001327	0.005426	0.001014	0.000328	0.000581	0.001178	0.000373	0.000701	0.000283	0.004368	0.026908	0.003637	0.000432	0.001088	0.00243	0.000194	0.000224	0.00085	0.003384	0.000626
Extended Data Fig. 7h
No. CD11b+ MHCIILow cells/g
brGM AAV-rVEGFR3	brGM AAV-Sham	brGM PBS	brLepto AAV-rVEGFR3	brLepto AAV-Sham	brLepto PBS	brDura AAV-rVEGFR3	brDura AAV-Sham	brDura PBS
22465.1	20547.5	21638.8	5082105	4682667	4365500	57008.7	117196	193352
14582.8	5428.44	26801	4537112	1925969	2766798	99821.8	13227.5	146342
19557.2	2622.66	7444.81	3005761	2761739	5144489	61855.7	41916.2	65261
5427.91	18506.7	5125.18	1947541	2154286	4448000	138618	58698	83640
51763.4	68572.8	23126.8	7053074	4062828	3964118	4955.33	12922.4	279043
114682	20780.6	119869	4705931	2200583	4738182	6238.3	5609.96	1495.97
131203	122837	127217	2467216	5363294	5717865	102693	17015.8	45705.3
No. CD11b+ MHCIIhighcells/g
brGM AAV-rVEGFR3	brGM AAV-Sham	brGM PBS	brLepto AAV-rVEGFR3	brLepto AAV-Sham	brLepto PBS	brDura AAV-rVEGFR3	brDura AAV-Sham	brDura PBS
64723.7	53614.3	63127.2	6673684	7184000	6559612	110664	214109	153070
32167.1	17175.2	82432.5	5422402	3834586	4098024	90314.9	16534.4	113821
41982.7	3734.43	36043.8	3413992	3937391	7701613	79528.7	51896.2	30120.5
33844.6	89805	22957.2	3298361	4551429	11424000	188434	87157.6	187354
11115.9	24901.8	11510	10879388	6581979	5859397	10455.9	11747.6	187736
32156.2	6181.58	28361.9	4342704	2513344	3375132	5198.59	1247.55	1485
60050	48379.2	17225.7	2171705	5448746	3324338	55896	14024.3	4797.23
