# Supplementary material for: Distinct roles of the meningeal layers in CNS autoimmunity
Source: Springer Nature journal article supplement (doi:10.1038/s41593-022-01108-3), 2022-06-30
Supplement: MOESM28 [file 41593_2022_1108_MOESM28_ESM.xlsx]

## Sheet: Tabelle1
Extended Data Fig. 8a
bSYN-tEAE
No. TbSYN cells/g				No. absolute TbSYN cells
Br Leptomeninges	Br Dura Hemisphere	Br Dura Sinus		Br Leptomeninges	Br Dura Hemisphere	Br Dura Sinus
10017951	177400	1418030		201361	816.042	9217.19
3413815	74407.3	1384921		52572.8	520.851	14541.7
10147100	670687	2003905		110603	7645.83	16231.6
7676796	190573	1395097		112849	1657.98	10602.7
bSYN-aEAE
No. TbSYN cells/g				No. absolute TbSYN cells
Br Leptomeninges	Br Dura Hemisphere	Br Dura Sinus		Br Leptomeninges	Br Dura Hemisphere	Br Dura Sinus
16014.2	3156.57	1087.46		320.285	25.3378	25.2525
8785.63	0	729.842		114.213	12.6263	0
8389.26	7313.51	1805.27		100.671	25.2738	51.1945
32193.8	0	2305.39		354.132	25.3593	0
17211.7	5154.64	0		154.905	0	51.5464
43252.6	3188.78	0		519.031	0	25.5102
11180.1	0	0		156.522	0	0
16457.7	0	717.463		181.035	6.45717	0
30223.2	815.661	1884.59		241.786	45.2303	4.0783
15704.4	2245.17	595.238		392.61	12.5	38.1679
10004	1101.56	463.542		170.068	12.5156	18.7266
35649.5	1460.16	259.74		499.093	7.27273	29.2032
14779.8	2069.54	1462.9		251.256	43.8871	37.2517
MBP-aEAE
No. TMBP cells/g				No. absolute TMBP cells
Br Leptomeninges	Br Dura Hemisphere	Br Dura Sinus		Br Leptomeninges	Br Dura Hemisphere	Br Dura Sinus
68864.8	2732.61	328.124		888.355	35.524	44.2968
173842	6202.32	18443.2		3302.99	71.3267	212.097
32179.2	0	1195.96		579.226	0	16.7434
57365.1	522.398	9275.8		1147.3	6.79117	176.24
122387	8741.93	16331.9		2325.36	166.097	244.978
123958	4225.29	9866.8		2355.21	97.1817	108.535
Extended Data 8c
TbSYN Cells (%)	Crawling	Crawling	Crawling	Crawling	Crawling	Crawling	Crawling	Crawling	Rolling	Rolling	Rolling	Rolling	Rolling	Rolling	Rolling	Rolling	Rolling	Fast Rolling	Fast Rolling	Fast Rolling	Fast Rolling	Fast Rolling	Fast Rolling	Fast Rolling	Fast Rolling
Leptomeninges	44	32.35	26.67	66.67	14.29	62.5	32.26	43.24	40	55.88	73.33	33.33		57.14	37.5	66.13	48.65	16	11.76	0	0	28.57	0	1.61	8.11
Dura hemispheres	0	0	22.22	0	12.5	12.5	9.62	2.94	42.86	32.26	22.22	16.67	45.83	50	54.81	64.71		57.14	67.74	55.56	83.33	41.67	37.5	35.58	32.35
Sinus	8.7	5.26	10	18.89	18.87	11.7			34.78	18.42	6.67	47.78	45.28	32.45				56.52	76.32	83.33	33.33	35.85	55.85
TOVA Cells (%)	Crawling	Crawling	Crawling	Crawling	Crawling	Crawling	Crawling	Crawling	Crawling	Crawling	Crawling	Crawling	Crawling	Crawling	Crawling	Crawling	Crawling	Crawling	Crawling	Crawling	Crawling	Crawling	Crawling	Crawling	Crawling	Crawling	Crawling	Crawling	Crawling	Crawling	Crawling	Crawling	Crawling	Rolling	Rolling	Rolling	Rolling	Rolling	Rolling	Rolling	Rolling	Rolling	Rolling	Rolling	Rolling	Rolling	Rolling	Rolling	Rolling
Leptomeninges	40	13.64	20	34.38	33.33	20	22.22	17.78	50	66.67	14.71	19.05	18.42	14.29	0	11.11	44.44	39.13	15	25	23.08	22.22	0	30	28.57									10	63.64	46.67	50	16.67	70	61.11	55.56	25	0	58.82	42.86	44.74	71.43	100	55.56
Dura hemispheres	0	6.25	0	7.5	11.43	0	0	0	0	6.67	10	0	0	100	0	0	0	23.08	0	25	0	0	3.77	15.38	0	0	20	9.09	7.69	0	10	7.69	0	0	43.75	100	52.5	42.86	50	100	28.57	50	40	50	50	0	0	0	100
Sinus	0	0	2.25	9.52	15.38	5.56																												37.5	42.86	44.38	28.57	53.85	16.67
Extended Data 8e
Ox40	Br Lepto	Br Lepto	Br Lepto	Br Lepto	Br Lepto	Br Lepto	Br Dura Hemisphere	Br Dura Hemisphere	Br Dura Hemisphere	Br Dura Hemisphere	Br Dura Sinus	Br Dura Sinus	Br Dura Sinus	Thymocytes	Thymocytes	Thymocytes
SYN	74.2	157	170				108	120			79.7	138		157	94.1	91
Ct	87.2	77.6	115	91.2	65.4	139	58	49.2	59.1	50.5	40.9	48.5	43.2	59	60.7	68.7
IL2R	Br Lepto	Br Lepto	Br Lepto	Br Lepto	Br Lepto	Br Lepto	Br Dura Hemisphere	Br Dura Hemisphere	Br Dura Hemisphere	Br Dura Hemisphere	Br Dura Sinus	Br Dura Sinus	Br Dura Sinus	Br Dura Sinus	Thymocytes	Thymocytes	Thymocytes	Thymocytes	Thymocytes	Thymocytes
BSYN	93.7	74.5	102				117	93.9			61.9	95.6			451	452	246
OVA	55	49.1	48.3	51.3	65.4	50.6	39.9	42.1	35.1	39.5	44.8	41.2	38	34.1	43.1	35.5	37.4	30	17.5	27
Extended Data 8f
Ifng	Sorted TbSYN cells	Rel. expression (to housekeeping gene)			Il17a	Sorted TbSYN cells	Rel. expression (to housekeeping gene)
Br Lepto	Br Dura Hemisphere	Br Dura Sinus			Br Lepto	Br Dura Hemisphere	Br Dura Sinus
0.0773	0.0393	0.00505	pooled sample		0.0049	0.00208	0.000477	pooled sample
0.0652		0.0112			0.00442		0.00115
0.1	0.0161	0.0148			0.00594	0.00292	0.000518
0.0419	0.0069	0.00498			0.00302	0.0014	0.000487
Extended Data 8g
Il17a	Sorted TOVA and TbSYN cells	ddCt (relative to TOVA dCt)
Br Lepto	Br Dura Hemisphere	Br Dura Sinus
6.84298	0.074734	0.493154
6.00668	0.10323	0.918986
6.6758	0.56842	0.665742
6.38589	0.334012	0.829671	pooled sample
4.96622	0.369278
[truncated: 50 more columns]
