# Supplementary material for: Distinct roles of the meningeal layers in CNS autoimmunity
Source: Springer Nature journal article supplement (doi:10.1038/s41593-022-01108-3), 2022-06-30
Supplement: MOESM29 [file 41593_2022_1108_MOESM29_ESM.xlsx]

## Sheet: Tabelle1
Extended Data Fig. 9a
	Clinical score						Body weight change
1st EAE	TbSYN average score	TbSYN st dev		TOVA average score		1st EAE	TbSYN average change	TbSYN st dev		TOVA average change	TOVA st dev
Day 0	0	0		0		Day 0	0	0		0	0
Day 1	0	0		0		Day 1	1.375	1.92261		0.125	1.72689
Day 2	0	0		0		Day 2	6.25	4.20034		3.875	2.74838
Day 3	0	0		0		Day 3	4	10.1136		6.75	4.0267
Day 4	0.8125	0.458063		0		Day 4	-17.125	10.3294		9	6.67618
Day 5	1.8125	0.593867		0		Day 5	-25.25	9.89589		14.75	6.15862
Day 6	2.25	0.46291		0		Day 6	-32.75	12.601		16.625	6.3457
Day 7	1.5	0.377964		0		Day 7	-30.75	10.3751		17.5	8.01784
Day 8	1.5	0.267261		0		Day 8	-25.875	9.53846		17.875	9.52347
Day 9	0.625	0.231455		0		Day 9	-22.125	9.61305		21.375	8.73315
Day 10	0.5625	0.176777		0		Day 10	-18	9.63624		23.625	10.0561
Day 11	0.1875	0.258775		0		Day 11	-10.625	7.981		21.75	11.8533
Day 12	0	0		0		Day 12	-7.625	7.94512		25.625	12.3859
Day 13	0	0		0		Day 13	0.5	6.80336		25.625	16.1151
Day 14	0	0		0		Day 14	5.875	6.35694		31.625	11.7709
Day 15	0	0		0		Day 15	5.875	6.35694		24.875	11.6182
2nd EAE						2nd EAE
Day 0	0	0		0		Day 0	0	0		0	0
Day 1	0	0		0		Day 1	3.125	3.13676		3.125	1.95941
Day 2	0	0		0		Day 2	4.125	4.12094		4.25	2.43487
Day 3	0.625	0.443203		0		Day 3	-21.625	6.06954		-2.375	21.7514
Day 4	2.625	0.231455		0		Day 4	-30.625	7.981		9.875	2.47487
Day 5	2.3125	0.258775		0		Day 5	-34.5	10.3372		12	3.25137
Day 6	1.8125	0.258775		0		Day 6	-35.375	15.0896		9	3.89138
Day 7	1.5625	0.176777		0		Day 7	-34.625	16.4224		11.875	3.72012
Day 8	1	0.46291		0		Day 8	-32	17.6068		14.125	3.18198
Day 9	0.25	0.267261		0		Day 9	-29.125	17.7879		14.75	4.83292
Day 10	0.0625	0.176777		0		Day 10	-25.5	17.2875		16.875	5.02671
Day 11	0	0		0		Day 11	-18.5	15.3157		22.25	8.82772
Day 12	0	0		0		Day 12	-13.375	15.9994		20.25	6.38637
Day 13	0	0		0		Day 13	-14.125	27.6686		23.25	10.0676
Day 14	0	0		0		Day 14	-0.875	11.0122		26.5	7.87401
3rd EAE						3rd EAE
Day 0	0	0		0		Day 0	0	0		0	0
Day 1	0	0		0		Day 1	1.5	4.69042		1.625	3.66206
Day 2	0	0		0		Day 2	-0.625	7.19002		1.25	4.13176
Day 3	0.375	0.353553		0		Day 3	-15	5.8064		1.75	4.39968
Day 4	1.75	0.377964		0		Day 4	-25.125	5.02671		-0.25	3.19598
Day 5	1.3125	0.593867		0		Day 5	-23.5	8.7831		4.375	3.29231
Day 6	1.25	0.534522		0		Day 6	-27.25	12.6914		2.5	4.44008
Day 7	0.5625	0.417261		0		Day 7	-26.375	11.275		5.125	4.79397
Day 8	0.375	0.353553		0		Day 8	-24	11.1098		10.625	8.50105
Day 9	0.375	0.353553		0		Day 9	-18.75	10.2225		6.875	3.39905
Day 10	0.0625	0.176777		0		Day 10	-17.375	9.60562		7.25	24.4701
Day 11	0	0		0		Day 11	-12.75	8.41342		9.5	3.0706
Day 12	0	0		0		Day 12	-7.75	6.67083		11	3.0706
Day 13	0	0		0		Day 13	-1.75	7.28501		12.125	4.61171
Day 14	0	0		0		Day 14	-0.375	5.92663		13	4.34248
Day 15	0	0		0		Day 15	4.25	6.62786		14.875	5.96268
4th EAE						4th EAE
Day 0	0	0		0		Day 0	0	0		0	0
Day 1	0	0		0		Day 1	-5	3.58569		-4.25	3.45378
Day 2	0	0		0		Day 2	-8	4.50397		-3.75	6.13538
Day 3	2	0		0		Day 3	-26.75	11.3106		-3.5	4.69042
Day 4	2.125	0.231455		0		Day 4	-33.125	8.88719		-1.5	3.42261
Day 5	2	0		0		Day 5	-36.25	11.5233		-0.125	4.76408
Day 6	1.5	0.534522		0		Day 6	-35.25	30.0321		1.25	3.65474
Day 7	0.5	0.534522		0		Day 7	-33.375	32.5705		4.375	5.57898
Day 8	0	0		0		Day 8	-33.75	32.9144		2.25	5.25765
Day 9	0	0		0		Day 9	-33.125	32.0109		2.375	4.47014
Day 10	0	0		0		Day 10	-31.75	30.269		2.625	3.85218
Day 11	0	0		0		Day 11	-29.875	29.5849		1.375	4.47014
Day 12	0	0		0		Day 12	-23.125	27.5807		6.625	5.39676
Day 13	0	0		0		Day 13	-20.5	30.4865		5	3.11677
Day 14	0	0		0		Day 14	-15.875	28.4627		3.875	3.60307
Day 15	0	0		0		Day 15	-14.375	16.1947		1.125	24.3219
Extended Data Fig. 9e
	Lepto	Lepto	Dura	Dura	dcLN	dcLN	ingLN	ingLN	Thymus
bSYN	1.71606		0.847165		1.19885		0.319737		0.454403
Ct	0.715846	0.764225	0.0577965	0.0014099	0.240746	0.0813588	0.0712068	0.161548	0.232475
