# Supplementary material for: Distinct roles of the meningeal layers in CNS autoimmunity
Source: Springer Nature journal article supplement (doi:10.1038/s41593-022-01108-3), 2022-06-30
Supplement: MOESM30 [file 41593_2022_1108_MOESM30_ESM.xlsx]

## Sheet: Tabelle1
Extended Data Fig. 10b
Mean nearest distance (mm)
Parasinu.	SSS frontalis	SSS parietalis	SSS occiptalis	Confluens sinuum	Sinus transversus re+li	Leptomeninges
1.20427	0.593524	0.526874	0.171981	0.433817	0.272679	0.111988
0.848042	0.665844	0.223137	0.325846	0.159298	0.176685	0.037597
0.36334	0.175883	0.174462	1.00301	0.193596	0.101203	0.113498
1.59328	0.245051	0.495848	0.572823	0.555175	0.144966	0.049151
0.564572	0.253841	0.333247	0.220652	0.084299	1.20968	0.093747
0.202146	0.191285	0.240811	0.091833		0.147803	0.106451
0.159393	0.104142	0.145883	0.321651			0.176607
0.833117	1.25379	0.143802	0.173536			0.049196
0.218346	1.04547	1.8215	0.704951			0.07002
1.45901	0.944583	0.32775	0.622108			0.125328
0.468272	0.307297	0.292407	0.279531			0.098502
0.95178	0.350949	0.134547				0.356996
						0.081055
